# Supplementary material
Source: publisher figshare collection journal article supplement (https://acs.figshare.com/ndownloader/files/5790654)

# Synthesis of 17-Substituted Estradiol-Pyridin-2-yl Hydrazine Conjugates as Effective Ligands for Labeling with Alberto's Complex $fac-[Re(OH_2)_3(CO)_3]^+$ in Water

Jeffrey B. Arterburn<sup>†\*</sup>, Cesear Corona, <sup>†</sup> Kalla Venkateswara Rao, <sup>†</sup> Kathryn E. Carlson,<sup>‡</sup> John A.  
Katzenellenbogen<sup>‡</sup>.

<sup>†</sup>Department of Chemistry and Biochemistry MSC 3C, New Mexico State University, P.O. Box  
30001, Las Cruces, NM 88003, and <sup>‡</sup>Department of Chemistry, University of Illinois, 600 S.  
Mathews Avenue, Urbana, Illinois 61801

|                                                                                                                                                                    |    |
|--------------------------------------------------------------------------------------------------------------------------------------------------------------------|----|
| General experimental methods.....                                                                                                                                  | S2 |
| Experimental data compounds <b>7a</b> , <b>9b</b> , <b>12a-i</b> , <b>15</b> , <b>16</b> , <b>21-26</b> .....                                                      | S3 |
| <sup>1</sup> H NMR and <sup>13</sup> C NMR spectra of compounds <b>1-4</b> , <b>7a</b> , <b>9b</b> , <b>12a-i</b> , <b>15</b> , <b>16</b> , and <b>21-26</b> ..... | S9 |

## SUPPORTING INFORMATION:

General Considerations: All experiments were performed in an efficient fume hood. Solvents and reagents were used without further purification. All air sensitive reagents were transferred in a dry-box, and the reactions were carried out under argon atmosphere. Silica gel 60, 70-230 mesh was used for column chromatography. Flash chromatography was performed using a medium pressure flash chromatography system utilizing preppacked silica gel columns. Deuterated solvents were used without further purification.

NMR spectra were acquired at ambient temperatures ( $18 \pm 2$  °C), unless otherwise noted. The  $^1\text{H}$  NMR spectra in  $\text{CDCl}_3$  were referenced to TMS unless otherwise noted. The  $^{13}\text{C} \{^1\text{H}\}$  NMR spectra were recorded at 50 or 100 MHz and referenced relative to the  $^{13}\text{C} \{^1\text{H}\}$  peaks of the solvent. Spectra are reported as ppm, (multiplicity, coupling constants (Hz), and number of protons). Melting points are uncorrected. Infrared spectra were recorded as KBr pellets or neat samples on NaCl plates and are reported in  $\text{cm}^{-1}$ .

**17 -[6-(chloro-pyridin-3-ylethynyl)]-estra-1,3,5(10)-triene-3,17 -diol (7a).** A 2-neck flask was charged with Pd (OAc)<sub>2</sub> (5.7 mg, 0.026 mmol) and PPh<sub>3</sub> (13.4 mg, 0.051 mmol) and was flushed with argon. Contents were suspended in diethylamine (1.5 mL) and the solution was allowed to stir under argon for 10 minutes. **6** (121 mg, 0.51 mmol) and CuI (9.7 mg, 0.051 mmol) were added as solids. After an additional 10 minutes, **5a** (150mg, 0.51mmol) was added and the mixture was allowed to stir for 6 h. Volatiles were removed under vacuum and residue was dissolved in CH<sub>2</sub>Cl<sub>2</sub> and filtered through celite. The filtrate was washed with H<sub>2</sub>O and dried over Na<sub>2</sub>SO<sub>4</sub>. After removal of solvent under vacuum, the brown residue was chromatographed (2.5% MeOH / CH<sub>2</sub>Cl<sub>2</sub>) to yield **7a** (93%) as a yellow solid. Mp: 132.8-133.9. IR (KBr): 3406, 2931, 2870, 2361,2343, 1611, 1499, 1456, 1385, 1359, 1286 cm<sup>-1</sup>. <sup>1</sup>H NMR (CDCl<sub>3</sub>, 400MHz): 8.45 (d, *J* = 2.2 Hz, 1H), 7.69(dd, *J* = 8.6, 2.2 Hz, 1H), 7.30 (d, *J* = 8.6 Hz, 1H), 7.17 (d, *J* = 8.42 Hz, 1H), 6.64 (dd, *J* = 8.4, 2.9 Hz, 1H), 6.57(d, *J* = 2.9 Hz, 1H) 4.57 (s, 1H), 2.86-2.80 (m, 2H), 2.50-2.35 (m, 2H) 2.250-1.95 (m, 2H), 1.95-1.60 (m, 4H), 1.60-1.25 (m, 6H) 0.94 (s, 3H). <sup>13</sup>C (CDCl<sub>3</sub> 50MHz): 153.6, 152.0, 141.1, 138.1, 132.1, 126.5, 123.9, 115.3, 112.8, 97.6, 80.4, 76.3, 49.9, 47.7, 43.6, 39.4, 39.1, 38.9, 33.2, 29.6, 27.2, 26.4, 22.9, 14.1, 12.9.

**17 -[6-(Chloro-pyridin-3-yl-(E)-ethenyl)]-estra-1,3,5(10)-triene-3,17 -diol (9b):** A mixture of **8b** (200 mg, 0.58 mmol) and CsF (222 mg, 1.46 mmol) were stirred under vacuum for 30 min. To the above material, **6** (174 mg, 0.72 mmol) and tetrakis(triphenylphosphine)palladium(0) (68 mg, 0.058 mmol) were added and the contents were dissolved in DME (5 mL). The reaction mixture was heated at 90 °C for 18 h. The mixture was filtered, and rinsed with CH<sub>2</sub>Cl<sub>2</sub>. The solvents were removed in vacuo and the residue chromatographed (50% EtOAc / Hex) to yield **9b** (195 mg, 84%) as a white solid. Mp: 229-228°C. IR (KBr): 3292, 2923, 1585, 1461, 1023 cm<sup>-1</sup>. <sup>1</sup>H (DMSO, 200 MHz,): 9.00 (s, 1H,), 8.45 (d, *J* = 4 Hz, 1H), 8.00 (dd, *J* = 2 Hz, *J* = 8 Hz, 1H), 7.41 (d, *J* = 8 Hz, 1H), 6.99 (d, *J* = 8 Hz, 1H), 6.85-6.35 (m, 4H),4.79(s,1H), 2.35-1.20 (m, 11H), 2.69 (s, 2H), 0.85 (s, 3H). <sup>13</sup>C (DMSO, 50 MHz,): 154.8, 154.7, 148.1, 147.8, 140.8, 137.1, 136.2, 132.5, 130.5, 125.8, 123.9, 121.0, 114.9,

112.6, 82.8, 48.7, 47.2, 43.1, 36.3, 32.3, 29.2, 27.1, 26.1, 23.1, 14.2. Anal. Calcd. for  $C_{25}H_{28}ClNO_2$ : C, 73.28; H, 6.88; N, 3.42. Found: C, 72.94; H, 7.08; N, 3.34.

**General Procedure (Table 1):** A Schlenk tube was charged with  $Pd_2(dba)_3$ , 1,1'-bis-(diphenylphosphanyl) ferrocene (dppf), di-*tert*-butyl hydrazodiformate **10** and aryl substrate **11a-11i** in a dry box. The tube was purged with argon and toluene (2 mL) was added. The reaction mixture was heated at 100 °C with stirring until the hydrazine derivative had been consumed, as judged by TLC. The reaction mixture was cooled, diluted with  $CH_2Cl_2$ , washed with water and concentrated under vacuum. The crude residue was purified by silica gel chromatography.

**N,N'-Bis-*tert*-butoxycarbonyl-(pyridin-2-yl)-hydrazine (12a):** The general procedure was followed with 2-bromopyridine **11b** (474 mg, 3 mmol), **10** (560 mg, 2.4 mmol),  $Pd_2(dba)_3$  (109 mg, 0.12 mmol) dppf (200 mg, 0.36 mmol, 12 mol %),  $Cs_2CO_3$  (1.05 g, 3 mmol). Column purification (20% EtOAc / Hex) gave (630 mg, 85%) of the coupled product **7a** as a white solid. Mp.: 80-82 °C. IR (KBr): 3171, 2975, 1731, 1595, 855, 771,  $cm^{-1}$ .  $^1H$  NMR ( $CDCl_3$ , 200 MHz): 8.58 (s, 1H), 8.34 (d,  $J = 4$  Hz, 1H), 7.62 (m, 2H), 7.00 (dd,  $J = 8, 4$  Hz, 1H), 1.40 (s, 9H), 1.36 (s, 9H).  $^{13}C$  NMR ( $CDCl_3$ , 50 MHz): 154.9, 153.5, 153.1, 147.3, 137.3, 120.3, 118.7, 82.1, 80.7, 27.9, 27.8. FAB MS (M+1) calcd. for  $C_{15}H_{23}N_3O_4$ : 310.1766. Found: 310.1766.

**N,N'-Bis-*tert*-butoxycarbonyl-(pyrazin-2-yl)-hydrazine (12d):** The general procedure was followed with iodopyrazine **11d** (206 mg, 1 mmol),  $Pd_2(dba)_3$  (37 mg, 0.04 mmol), dppf (67 mg, 0.12 mmol),  $Cs_2CO_3$  (352 mg, 1 mmol), and **10** (186 mg, 0.8 mmol). Column purification (20% EtOAc / Hex) gave (210 mg, 85% yield) of the coupled product **12c** as a white solid. Mp: 102 °C. IR (KBr) 3191, 2998, 1737, 1347, 1020  $cm^{-1}$ .  $^1H$  ( $CDCl_3$ , 200 MHz): 9.12 (s, 1H), 8.35 (d,  $J = 2$  Hz, 2H), 7.82 (s, 1H), 1.54 (s, 9H), 1.47 (s, 9H).  $^{13}C$  ( $CDCl_3$ , 50 MHz): 154.7, 152.6, 150.4, 141.5, 140.1, 139.9, 83.4, 81.5, 28.0, 27.91. Anal. Calcd. for  $C_{14}H_{22}N_4O_4$ : C, 54.18; H, 7.15; N, 18.05. Found: C, 54.20; H, 7.40; N, 18.03.

**N,N'-Bis-*tert*-butoxycarbonyl-(pyridin-4-yl)-hydrazine (12e):** The general procedure was followed with 4-bromopyridine hydrochloride **11e** (195 mg, 1 mmol), **10** (187 mg, 0.8 mmol), Pd<sub>2</sub>(dba)<sub>3</sub> (37 mg, 0.04 mmol), DPPF (67 mg, 0.12 mmol), Cs<sub>2</sub>CO<sub>3</sub> (704 mg, 2 mmol). Column purification (50% EtOAc / Hex) gave (200 mg, 80%) the coupled product **12e** as a white solid. IR (KBr) 3176, 2977, 1744, 1595, 839, 765 cm<sup>-1</sup>. <sup>1</sup>H NMR (CDCl<sub>3</sub>, 400 MHz): 8.50 (d, *J* = 4.0 Hz, 1H), 7.95 (s, 1H), 7.50 (d, *J* = 4 Hz, 2H), 6.65 (s, 1H), 1.54 (s, 9H), 1.52 (s, 9H). <sup>13</sup>C (CDCl<sub>3</sub>, 50 MHz): 155.0, 152.2, 149.9, 149.2, 114.2, 83.5, 81.9, 28.9 ppm.

**N,N'-Bis-*tert*-butoxycarbonyl-(6-nitro-pyridin-3-yl)-hydrazine (12i).** The general procedure was followed with 5-Bromo-2-nitro-pyridine **11i** (406 mg, 2 mmol), **10** (371 mg, 1.6 mmol), Pd<sub>2</sub>(dba)<sub>3</sub> (73 mg, 0.08 mmol), dppf (133 mg, 0.24 mmol), Cs<sub>2</sub>CO<sub>3</sub> (650 mg, 2.2 mmol). After 18 hrs. the reaction mixture was cool to r.t. diluted with CH<sub>2</sub>Cl<sub>2</sub>, filtered through celite and washed with H<sub>2</sub>O. Solvent was dried over Na<sub>2</sub>SO<sub>4</sub> and volatiles were removed in vacuo. Flash chromatography (20% EtOAc / Hex) was used to separate the most polar impurities from the resulting red solid. Column eluent was concentrated and the residual dissolved in a minimal volume of EtOAc. Hexanes were added until the solution began to cloud. Upon cooling to 0 C, a yellow solid crystallized from the solution that was collect by filtration and washed with cold hexanes. The solid was dried under vacuum yielding (188 mg, 33%) **12i** as a yellow solid. Mp: 121.0-122.3. IR (KBr) 3191, 2987, 1746, 1574, 1546, 1476, 1305, 1168 cm<sup>-1</sup>. <sup>1</sup>H NMR (CDCl<sub>3</sub>, 400 MHz): 8.79 (s, 1H), 8.23 (s, 2H), 7.16 (s, 1H), 1.54 (s, 9H), 1.52 (s, 9H). <sup>13</sup>C (CDCl<sub>3</sub>, 100 MHz): 154.9, 151.9, 143.7, 140.7, 130.3, 118.1, 84.7, 82.9, 28.04, 27.92.

**N,N'-Bis-*tert*-butoxycarbonyl-(4-nitro-phenyl)-hydrazine (15):** The general procedure was followed with 1-bromo-4-nitrobenzene **14** (150 mg, 0.74 mmol), **10** (172 mg, 0.74 mmol), Pd<sub>2</sub>(dba)<sub>3</sub> (27 mg, 0.03 mmol), dppf (49 mg, 0.09 mmol), Cs<sub>2</sub>CO<sub>3</sub> (268 mg, 0.82 mmol). Column chromatography (15% EtOAc / Hex) yielded (166 mg, 80%) **15** as a white solid. Mp: 121-122 C. IR (KBr) 3325,

2982, 1736, 1595, 856  $\text{cm}^{-1}$ .  $^1\text{H}$  NMR ( $\text{CDCl}_3$ , 400 MHz): 8.14 (d,  $J = 8.8$  Hz, 2H), 7.66 (d,  $J = 8.8$ , 2H), 7.12 (s, 1H) 1.53 (s, 9H), 1.52 (s, 9H).  $^{13}\text{C}$  ( $\text{CDCl}_3$ , 100 MHz): 155.0, 152.4, 147.6, 143.6, 123.9, 121.1, 83.6, 82.2, 28.0, 27.9.

**2-Chloro-5-hex-1-ynyl-pyridine (21).**  $\text{Pd}(\text{OAc})_2$  (22.4 mg, 0.1 mmol),  $\text{PPh}_3$  (38 mg, 0.2 mmol), and  $\text{Et}_2\text{NH}$  (2 mL) were charged into a two-neck flask and the suspension stirred for ten min.  $\text{CuI}$  (38mg, 0.2 mmol) and **5** (479 mg, 2mmol) were added, then after ten min 1-hexyne (0.23mL, 2mmol) was added and the reaction was stirred at rt overnight. Volatiles were removed under vacuum and the residue was dissolved in EtOAc, filtered through celite, washed with water, dried over  $\text{Na}_2\text{SO}_4$  and concentrated under vacuum. The product was chromatographed (5%EtOAc / Hex) to yield (384mg, 90%) **21** as a colorless oil. IR (neat): 2959, 2933, 2234, 1581, 1545, 1456, 1358, 1135, 1109, 1025, 833  $\text{cm}^{-1}$ .  $^1\text{H}$  NMR ( $\text{CDCl}_3$ , 400 MHz): 8.39 (d,  $J = 2.4$  Hz, 1H), 7.61 (dd,  $J = 2.4, 8.4$  Hz, 1H), 7.24 (d,  $J = 8.4$  Hz, 1H), 2.42(t,  $J = 7$  Hz, 2H), 1.57(m, 2H), 1.46 (m, 2H), 0.95 (t,  $J = 7.2$  Hz, 3H).  $^{13}\text{C}$  ( $\text{CDCl}_3$ , 100 MHz): 151.8, 149.4, 140.7, 123.4, 119.9, 95.1, 75.9, 30.3, 21.8, 18.9, 13.4.

**N,N'-Bis-tert-butoxycarbonyl-(5-Hex-1-ynyl-pyridin-2-yl)-hydrazine (22)** A Schlenk tube was charged with **10** (225mg, 0.97 mmol) and **21** (235mg, 1.2 mmol).  $\text{Pd}_2(\text{dba})_3$  (44mg, 0.048 mmol), dppf (80 mg, 0.144 mmol) and  $\text{Cs}_2\text{CO}_3$  (423 mg, 1.3 mmol) were added in a dry box. The tube was purged with argon and toluene (2.5 mL) was added. The reaction mixture was heated at 100  $^\circ\text{C}$  with stirring for 19 h. The reaction mixture was cooled, diluted with EtOAc, filtered through celite, washed with water, dried over  $\text{Na}_2\text{SO}_4$  and concentrated under vacuum. The crude residue was purified by flash chromatography (20% EtOAc / Hex) to give (252 mg 67%) **22** as a colorless oil. IR (neat): 3331, 3191, 2979, 2361, 2254, 1724, 1716, 1482, 1176  $\text{cm}^{-1}$ .  $^1\text{H}$  NMR ( $\text{CDCl}_3$ , 400 MHz): 8.57(s, 1H), 8.42 (s, 1H), 7.71 (d,  $J = 8$  Hz, 1H), 7.65 (d  $J = 8\text{Hz}$ , 1H), 2.42 (t,  $J = 7.4\text{Hz}$ , 2H), 1.62-1.45 (m, 22H), 0.95 (t  $J = 7.3\text{Hz}$ , 3H).  $^{13}\text{C}$  ( $\text{CDCl}_3$ , 100 MHz): 154.9, 152.9, 151.9 150, 139.8, 117.6, 93.2, 82.5, 80.9, 76.9, 30.5, 28.1, 27.9, 21.8, 19.0, 13.5.

**2-Chloro-5-styryl-pyridine (23).** *Trans*-vinylphenyl boronic acid (326 mg, 2.2 mmol), **5** (479mg, 2.0 mmol), Pd(OAc)<sub>2</sub> (45 mg, .02 mmol) tetrabutyl ammonium bromide (645 mg, 2 mmol), and K<sub>2</sub>CO<sub>3</sub> (529 mg, 5 mmol) were suspended in degassed H<sub>2</sub>O (2 mL) under argon. The mixture was heated to reflux for 16 hrs. Water (10 mL) was added, and extracted three times with CH<sub>2</sub>Cl<sub>2</sub> (3 x 30 mL). The combined extracts were concentrated under vacuum and purified by silica gel column chromatography (5% EtOAc / Hex) to give (220mg, 51%) **23** as a white solid. Mp: 84–85 °C. IR (KBr): 3434, 3029, 2362, 1553, 1459, 1372, 1146, 1099, 962 cm<sup>-1</sup>. <sup>1</sup>H NMR (CDCl<sub>3</sub>, 400 MHz): 8.38 (d, *J*=2.8 Hz, 1H), 7.67 (dd, *J*=2.8, 8.4 Hz, 1H), 7.44 (m, 2H) 7.33 (m, 2H) 7.28 (m, 1H) 7.22 (d, *J*=8.2 Hz, 1H), 7.03 (d, *J*=16.4 Hz, 1H), 6.91 (d, *J*=16.4 Hz, 1H). <sup>13</sup>C (CDCl<sub>3</sub>, 100 MHz): 149.5, 147.8, 135.9, 134.9, 131.7, 130.1, 128.5, 128.16, 126.4, 123.9, 123.0.

**N,N'-Bis-*tert*-butoxycarbonyl-(5-styryl-pyridin-2-yl) hydrazine (24).** A Schlenk tube was charged with **10** (129mg, 0.56 mmol), **23** (150mg, 0.7 mmol). Pd<sub>2</sub>(dba)<sub>3</sub> (26mg, 0.028 mmol), dppf (47 mg, 0.084 mmol), Cs<sub>2</sub>CO<sub>3</sub> (247 mg, 0.76 mmol), and toluene (1.5 mL). The reaction mixture was heated at 100 °C with stirring for 29 hrs. The reaction mixture was cooled, diluted with EtOAc, filtered through celite, washed with water, dried over Na<sub>2</sub>SO<sub>4</sub> and concentrated under vacuum. The crude residue was purified by flash chromatography (30% EtOAc / Hex) to yield (130 mg, 57%) **24** as a white solid. IR (KBr): 3347, 2978, 2935, 1728, 1481, 1369, 1343, 1296, 1248, 1156 cm<sup>-1</sup>. <sup>1</sup>H NMR (CDCl<sub>3</sub>, 400 MHz): 8.47 (d *J* = 2.0 Hz, 1H), 7.86 (dd, *J* = 8.6, 2 Hz, 1H), 7.52 (m, 2H), 7.37(m, 2H), 7.29(m, 2H), 7.11(d, *J* = 16.4 Hz, 1H), 7.04(d, *J* = 16.4 Hz, 1H), 1.54 (s, 9H), 1.48(s, 9H). <sup>13</sup>C NMR (CDCl<sub>3</sub>, 400 MHz): 155.0, 153.1, 152.6, 146.2, 136.6, 134.1, 130.0, 128.7, 127.5, 126.5, 124.2, 118.4, 82.6, 81.1, 28.

**17 -[6-(Hydrazino-pyridin-3-ylethynyl)]-estra-1,3,5(10)-triene-3,17 -diol hydrochloride (25).** Compound **1** (125 mg, 0.2 mmol) was dissolved in absolute ethanol (4 mL) and cooled to 0 °C. To the stirred solution was added con. HCl (1 mL) dropwise over 2 min, then stirred at room temperature for

6 h. The volume of the solvent was decreased under vacuum to 1.0 mL and cold H<sub>2</sub>O (45 mL) was added to precipitate a yellow solid that was collected by vacuum filtration. The solid was dried and residual water was removed under high vacuum affording (84mg, 95%) of **25**. IR (KBr): 3300-2200 (br), 1658 cm<sup>-1</sup>. <sup>1</sup>H NMR (10%DMSO/CDCl<sub>3</sub>, 400MHz): 7.96 (d, *J* = 2 Hz, 1H), 7.63 (dd, *J* = 2, 9.2 Hz, 1H), 7.22 (d, *J* = 9.2 Hz, 1H), 7.11 (d, *J* = 8 Hz, 1H), 6.63 (dd, *J* = 2.4, 8 Hz, 1H), 6.56 (d, *J* = 2.4 Hz, 1H) 4.55(s, 4H), 2.79 (m, 2H), 2.33 (m, 2H) 2.21-2.03 (m, 2H) 1.83 (m, 2H) 1.66 (m, 2H), 1.5-1.25 (m, 4H), 0.89(s, 3H). <sup>13</sup>C (DMSO, 100MHz): 154.96, 154.95, 148.3, 140.7, 137.1, 130.2, 126.1, 114.9, 112.8, 111.8, 109.3, 96.29, 80.9, 78.7, 49.4, 47.2, 43.3, 34.2, 32.9, 29.2, 27.0, 26.3, 22.6, 12.9.

**17 -[6-(Hydrazino-pyridin-3-yl-(E)-ethenyl)]-estra-1,3,5,16(8)-tetraene-3-ol hydrochloride (26).** Compound **2** (100 mg, 0.165mmol) was dissolved in EtOAc (1.5mL). To the stirred solution was added con. HCl (0.5 mL) dropwise over 1 min, then stirred for 2 h in which time the product precipitated out of solution. The solid was dried under high vacuum and triturated with Et<sub>2</sub>O (10 mL). Drying under high vacuum yielded **26** (67.6 mg, 97%) as a yellow solid. IR (KBr): 3300-2200 (br) 1658 cm<sup>-1</sup>. <sup>1</sup>H NMR (10%DMSO / CDCl<sub>3</sub>, 400 MHz): 7.89(dd, *J* = 9.6, 1.2Hz, 1H), 7.73(d, *J* = 1.2Hz, 1H), 7.32(d, *J* = 8Hz, 1H), 7.10 (d, *J*=8 Hz, 1H), 6.60(m, 4H), 5.94(t, *J* = 3.2Hz, 1H), 2.84(s, 2H), 2.32(m 4H), 2.04(m,2H), 1.89(m, 2H), 1.69(m, 4H) 1.43(m,2H) 1.25(m, 1H) 0.96(s, 3H). <sup>13</sup>C NMR (DMSO, 100 MHz): 155.0, 154.1, 152.5, 146.4, 140.3, 137.0, 136.0, 130.3, 125.7, 125.2, 124.1, 122.3, 115.0, 112.8, 110.5, 56.1, 46.1, 43.7, 36.9, 34.8, 30.8, 29.1, 27.3, 26.3, 16.0.



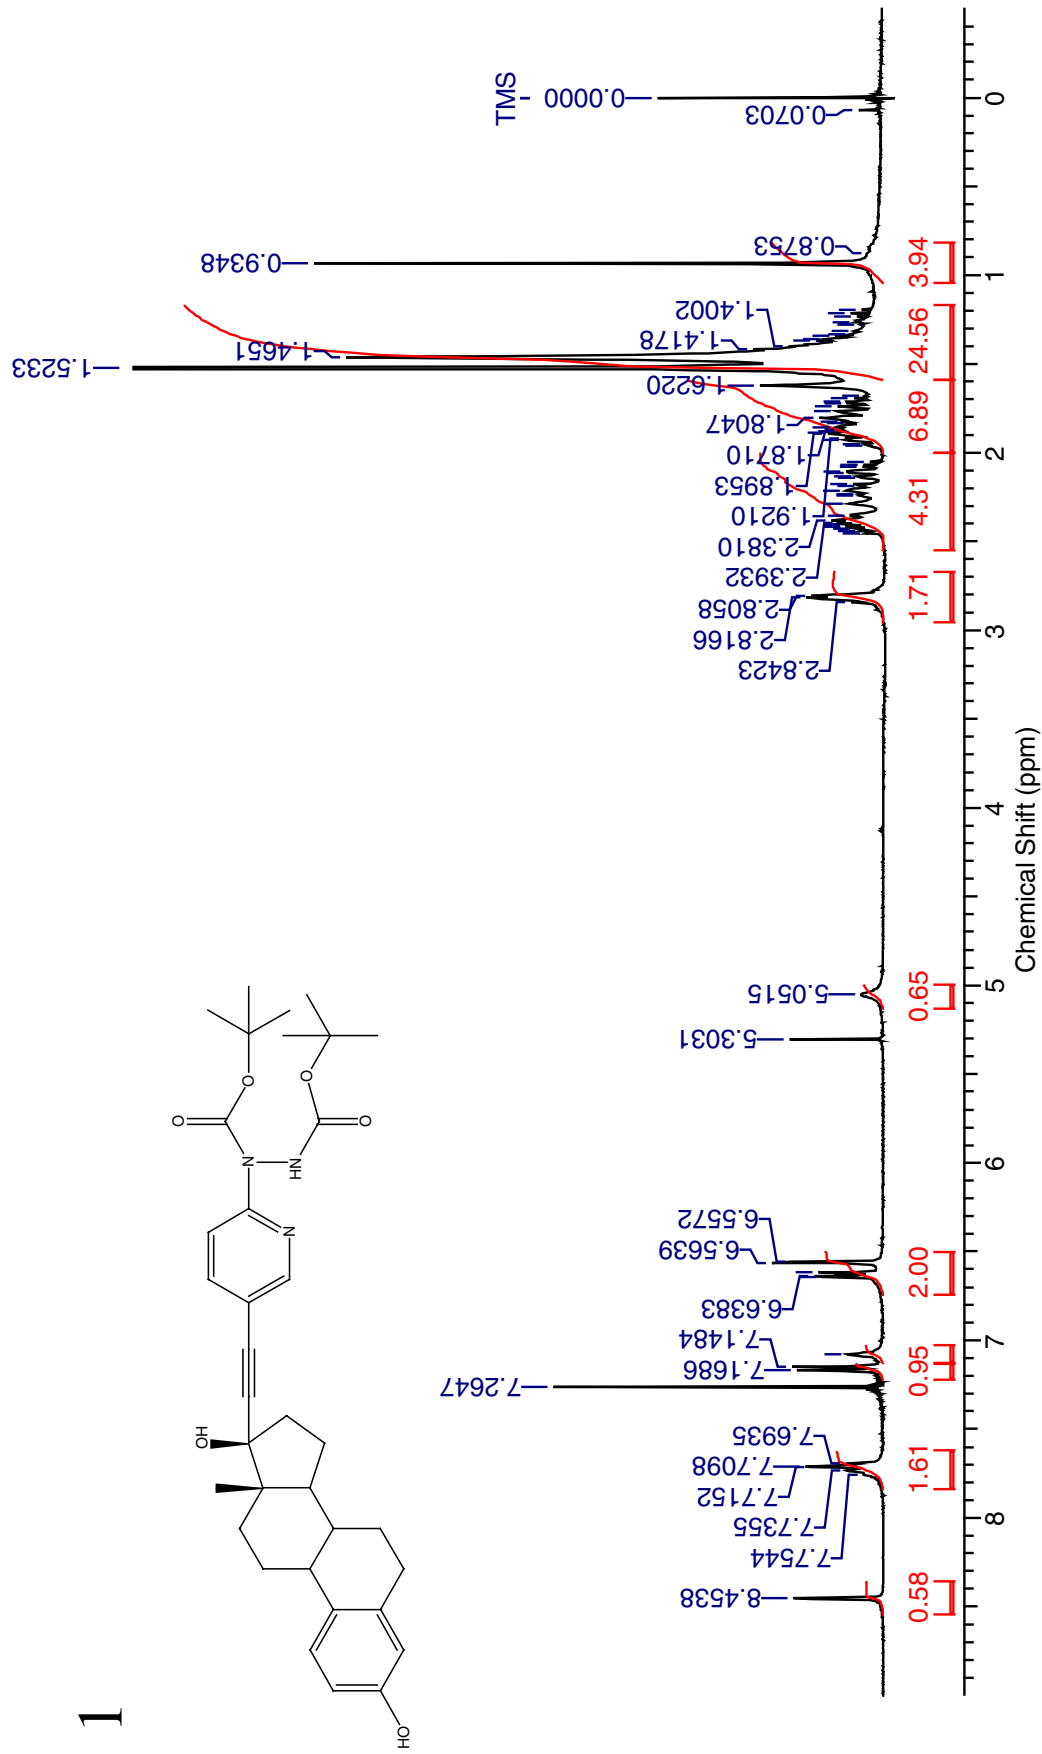

1

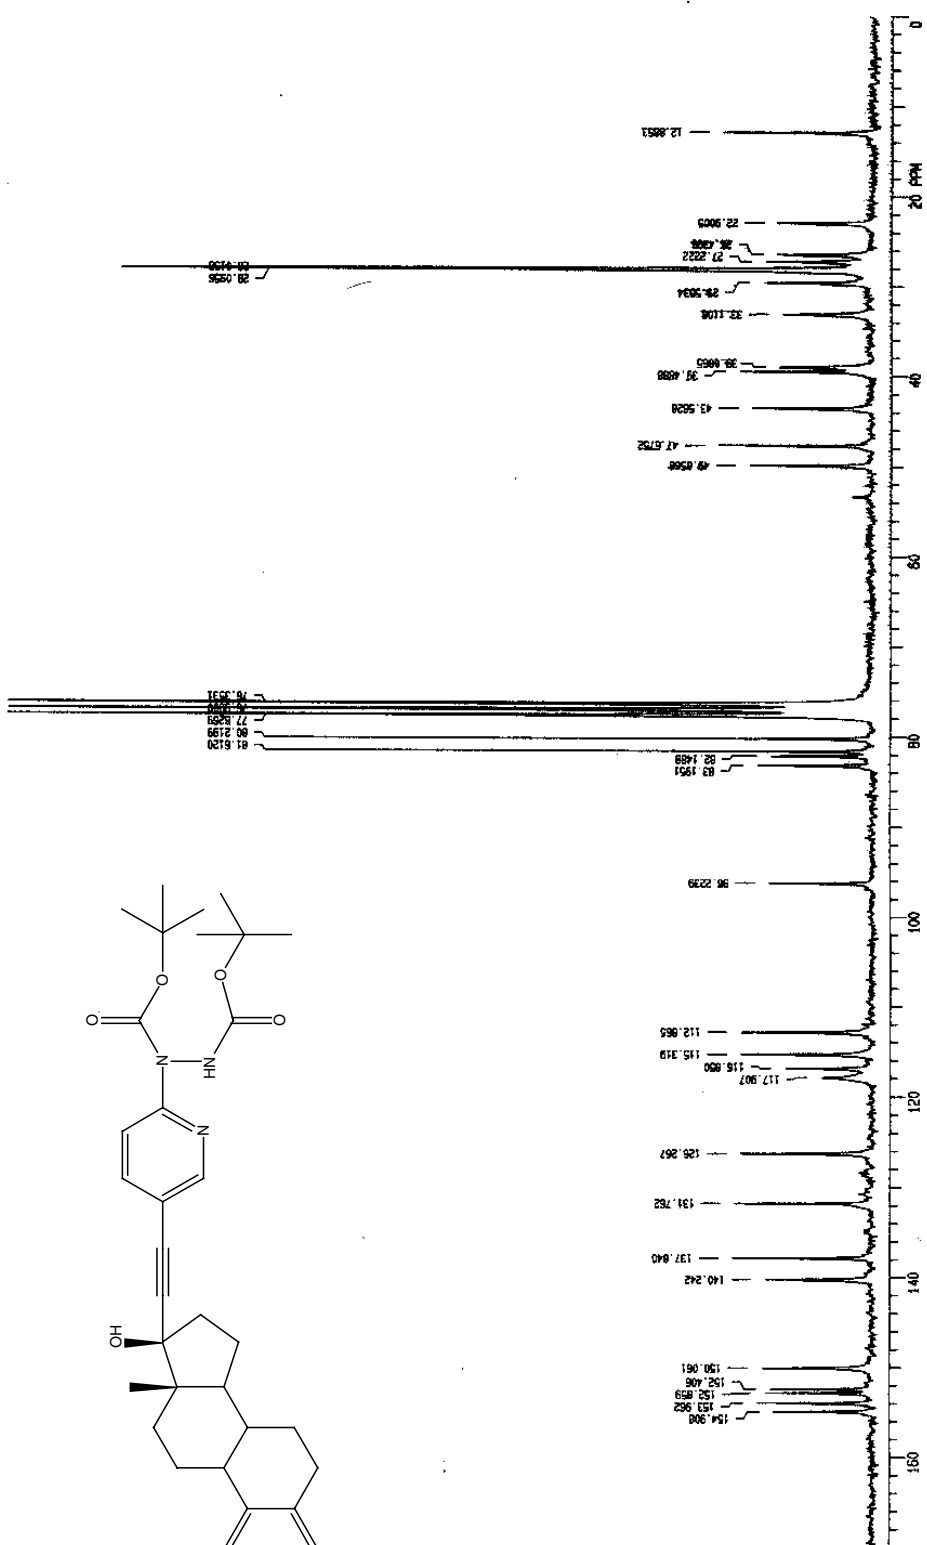

1

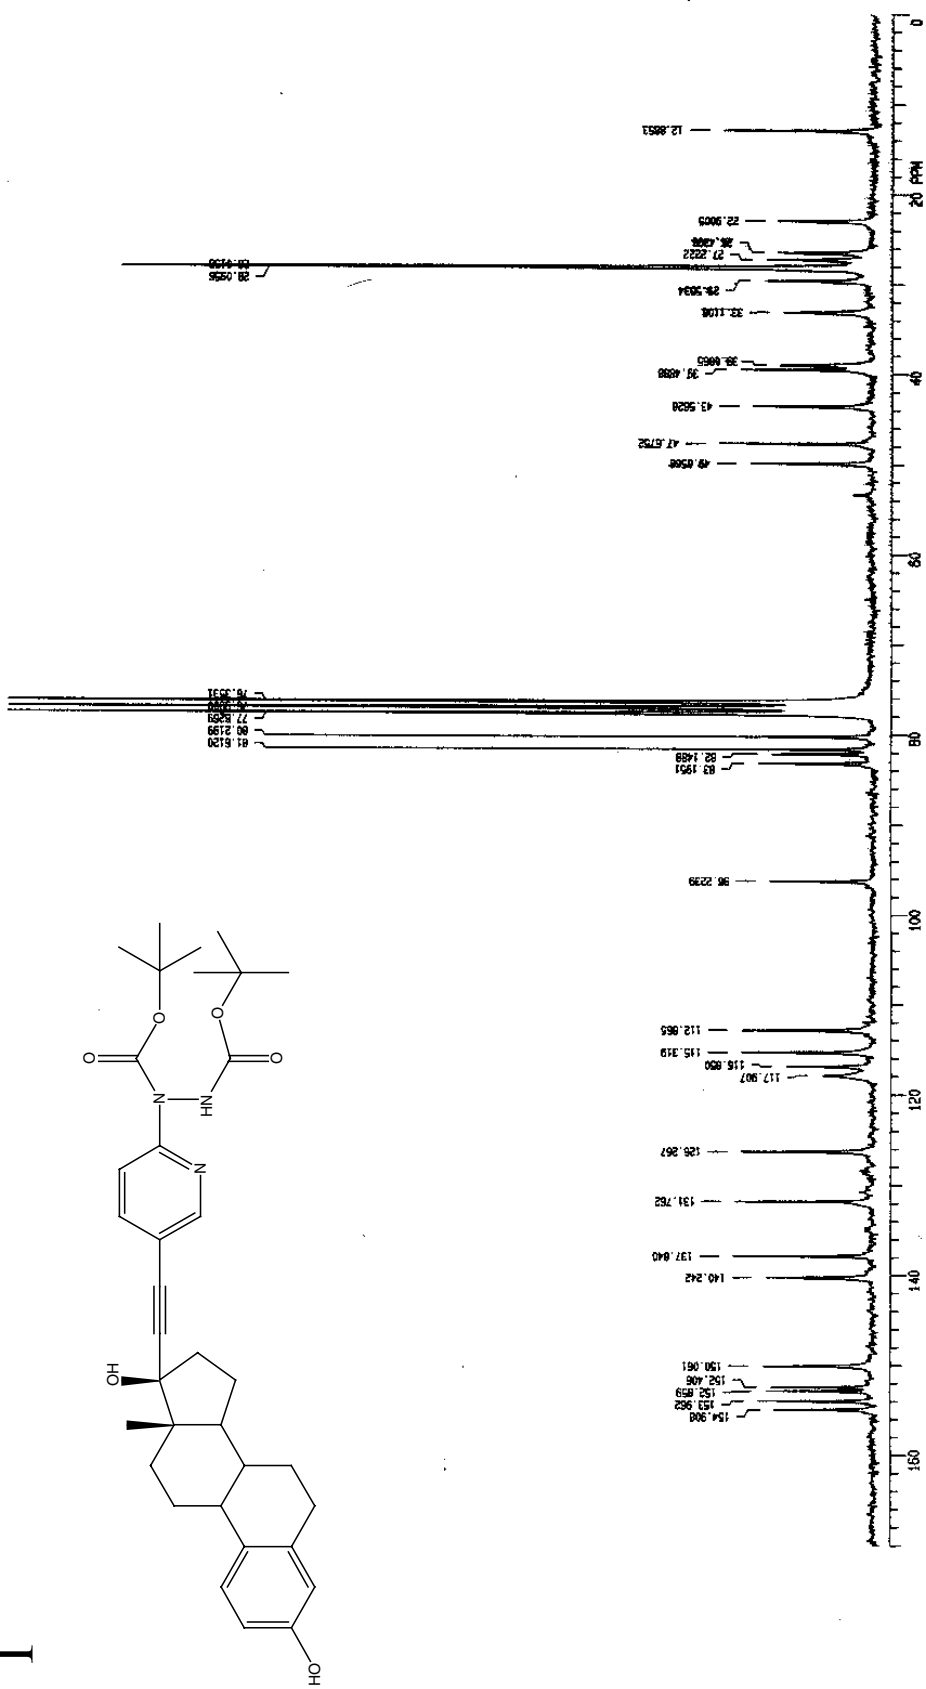

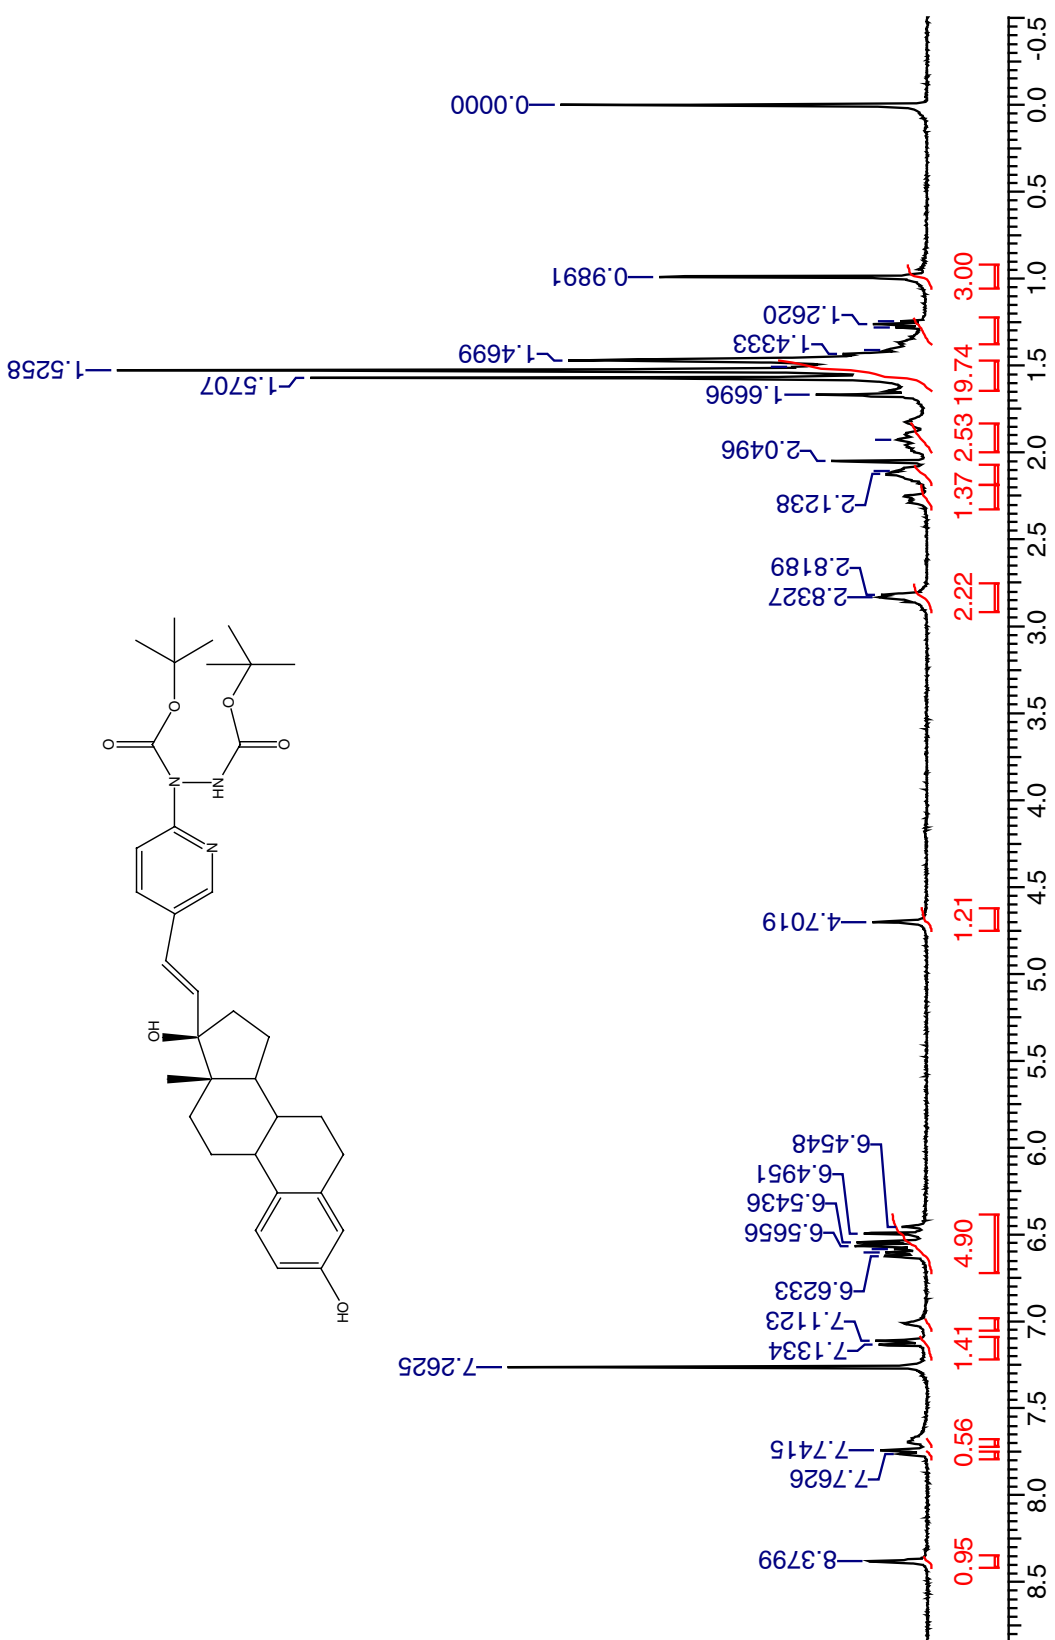

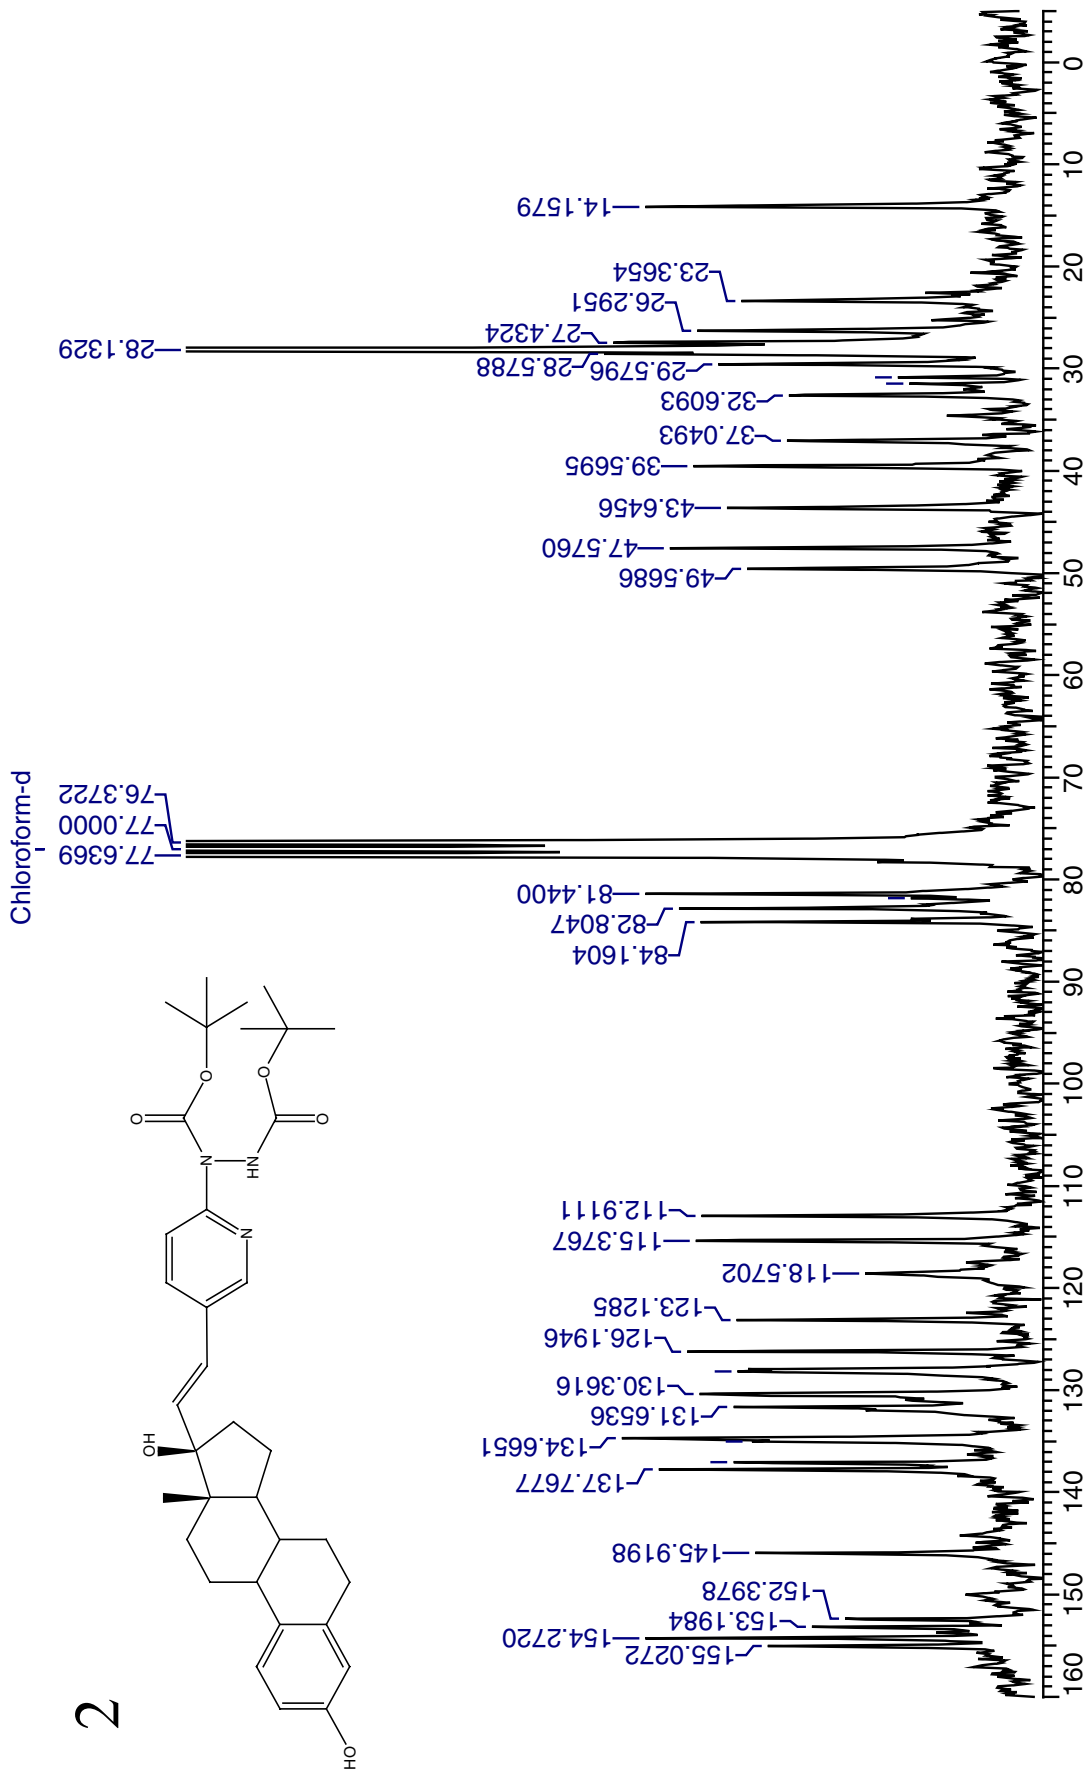

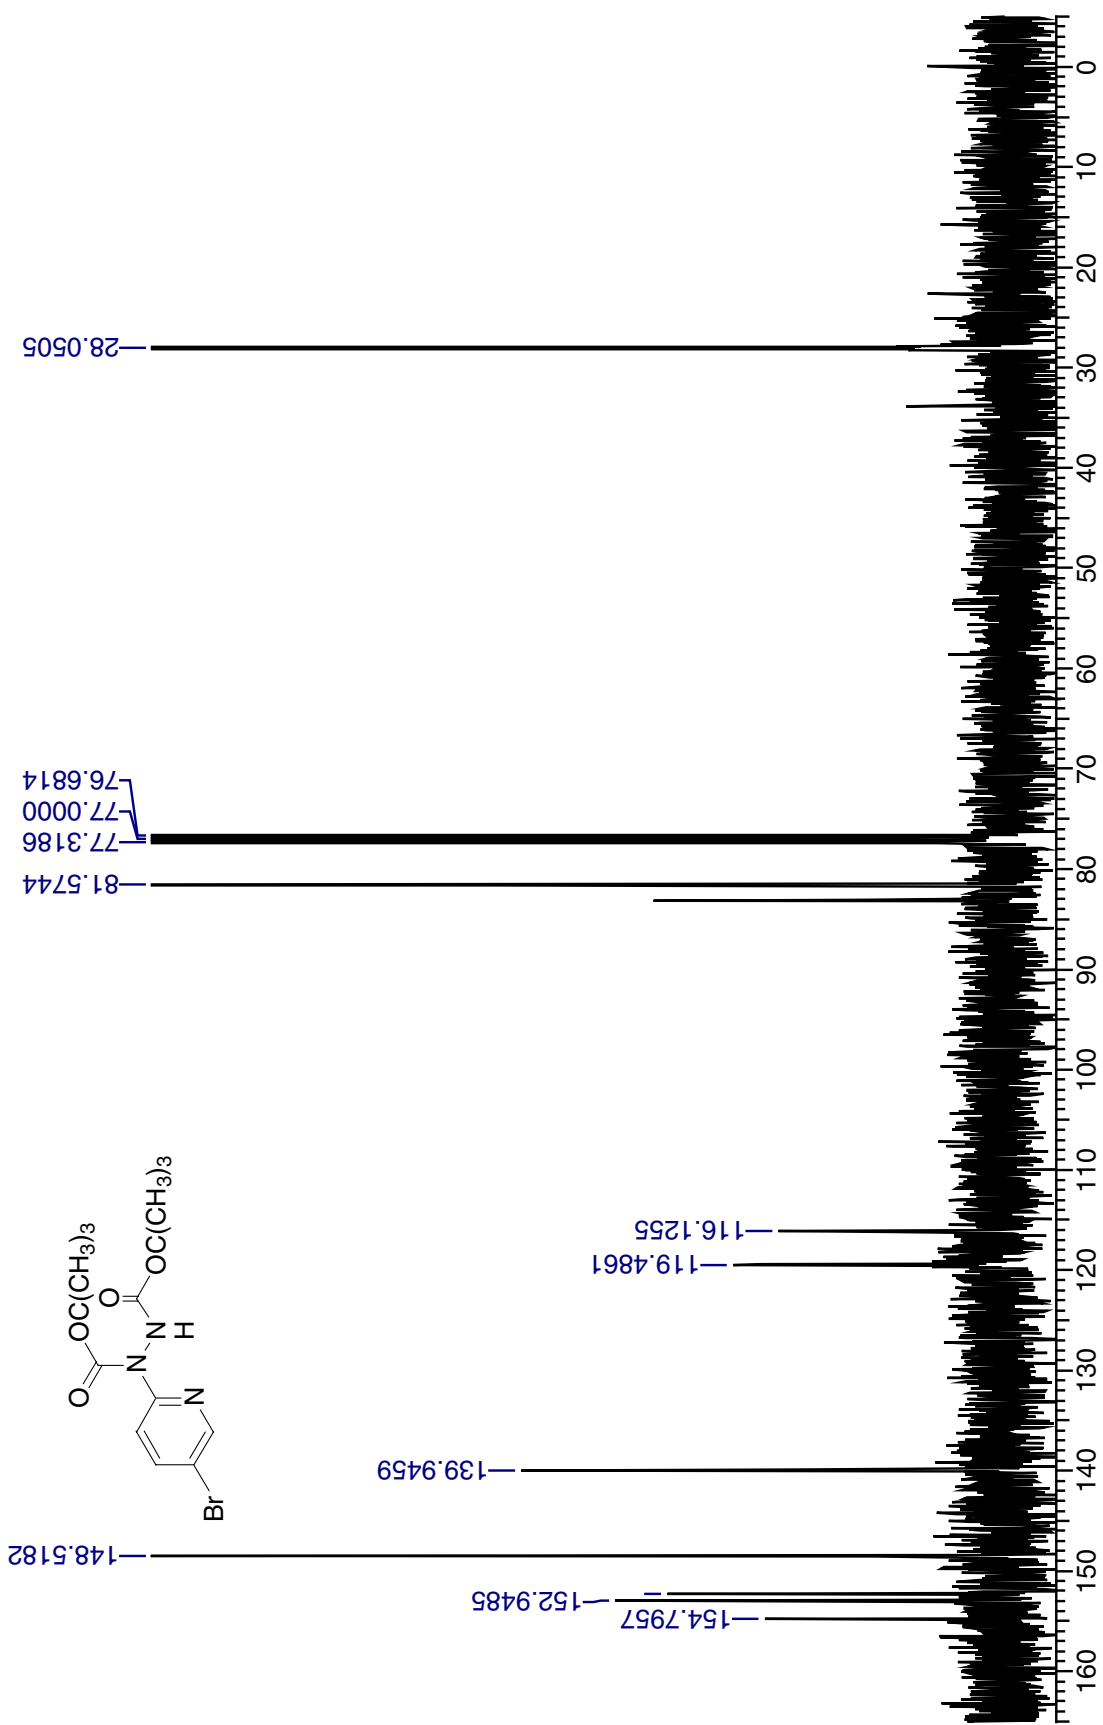

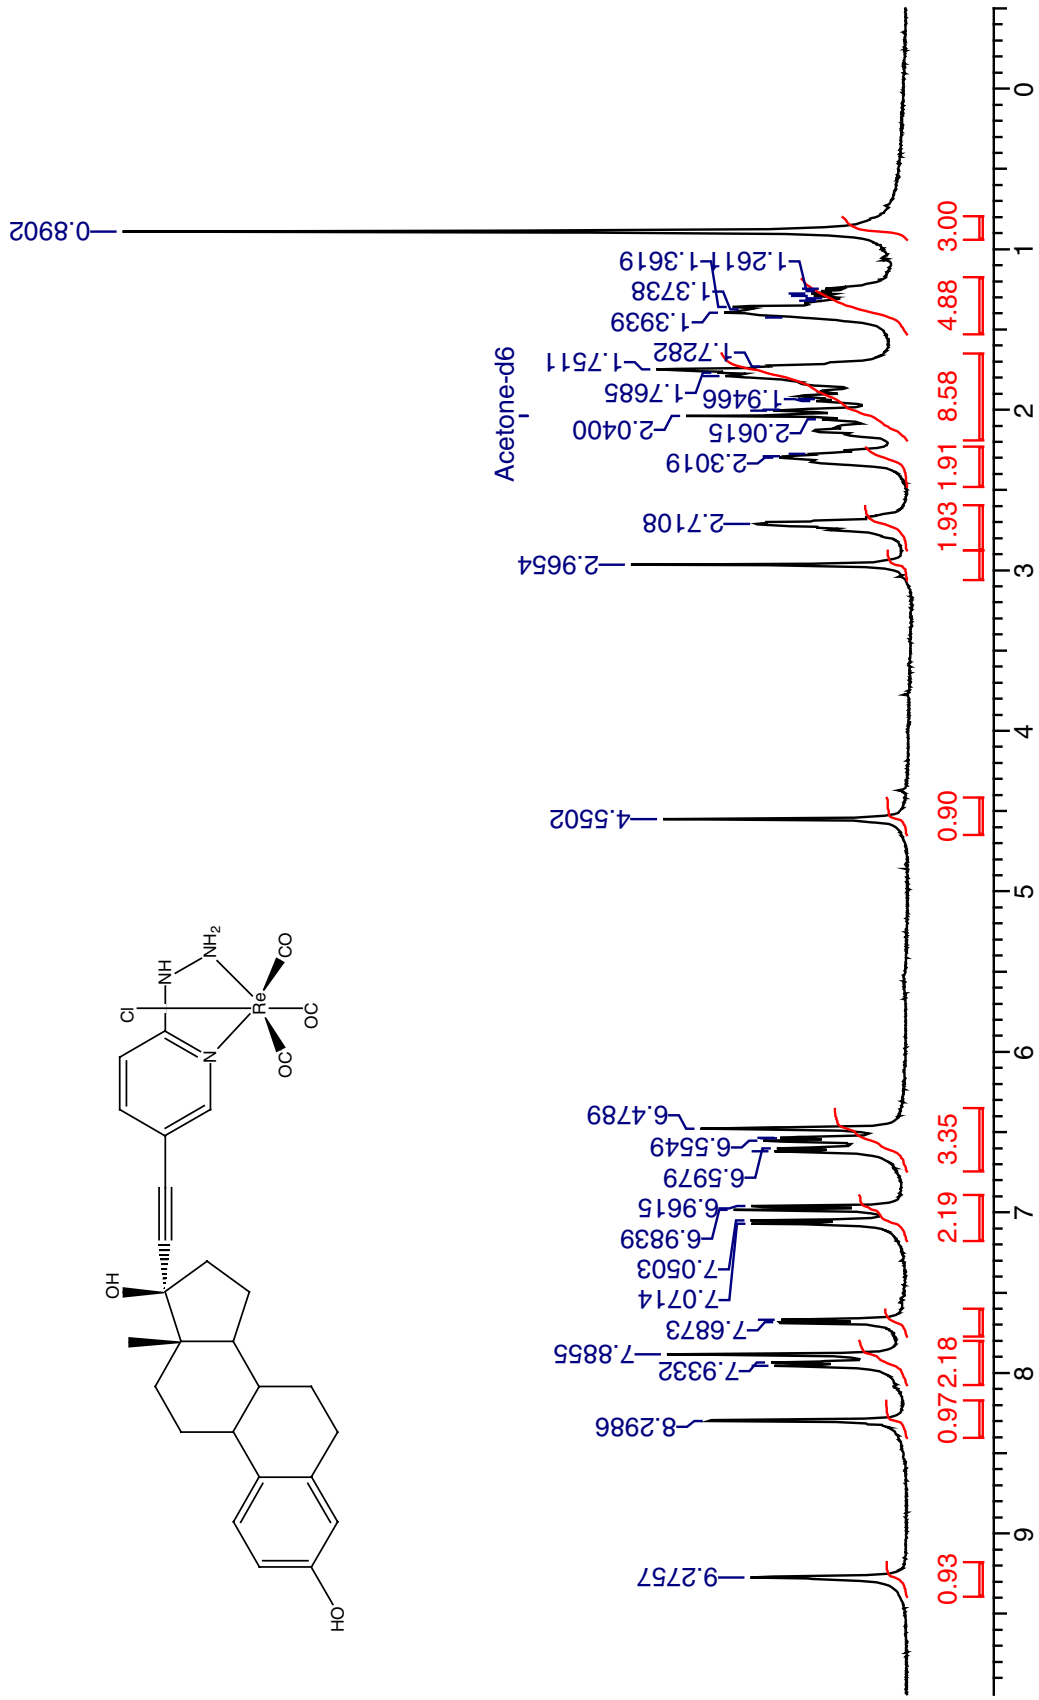

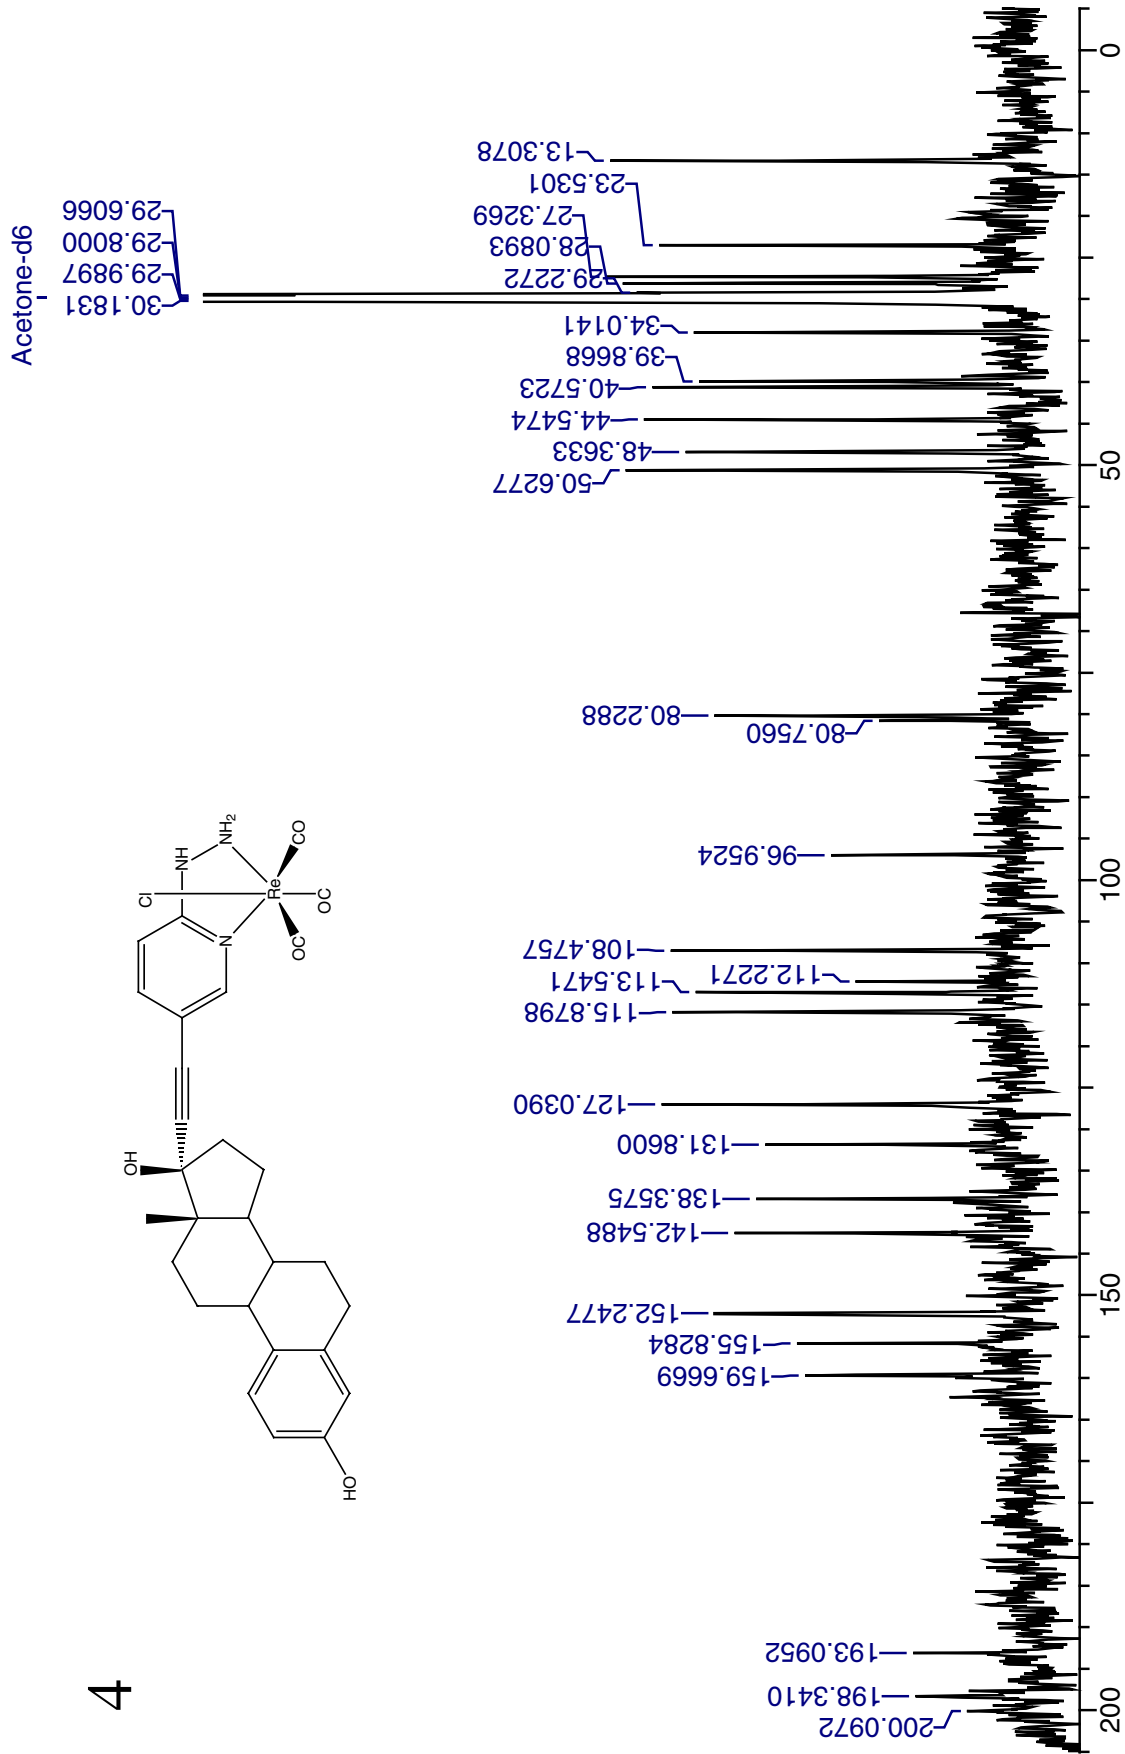



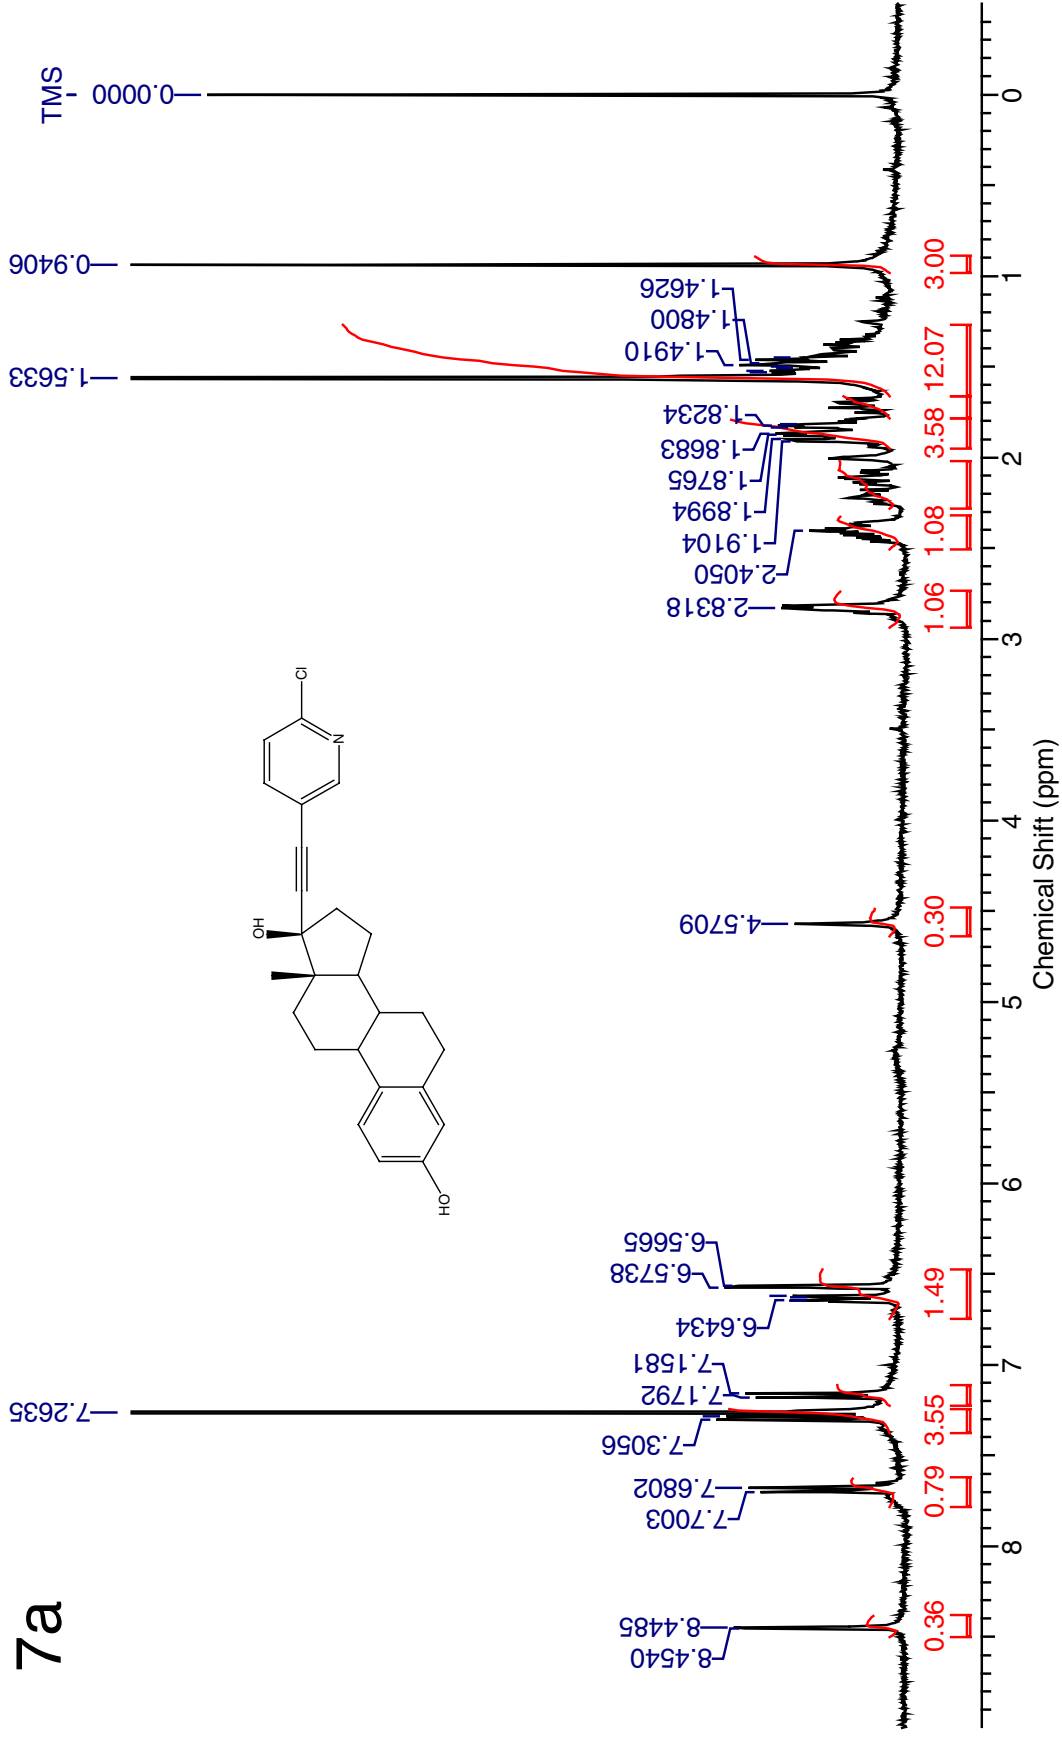

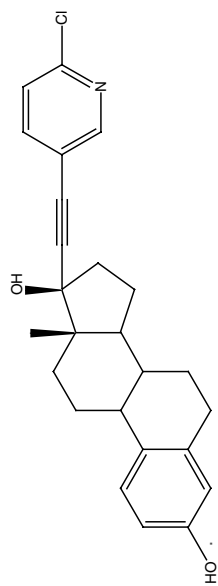

7a

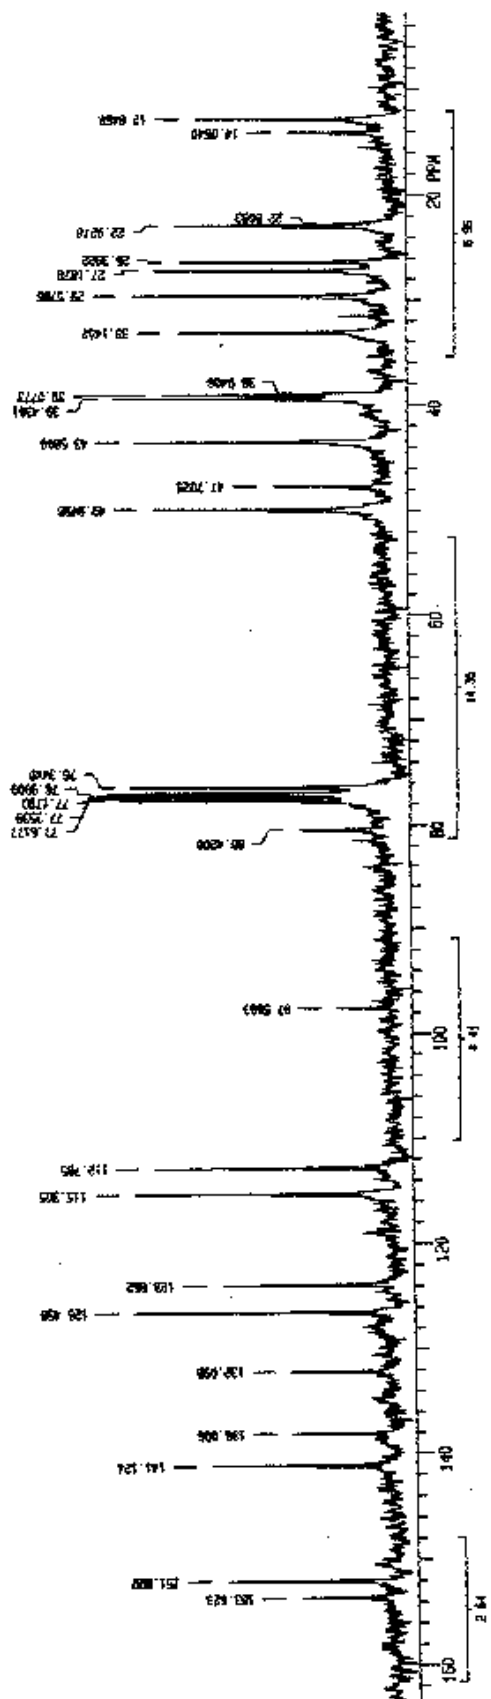

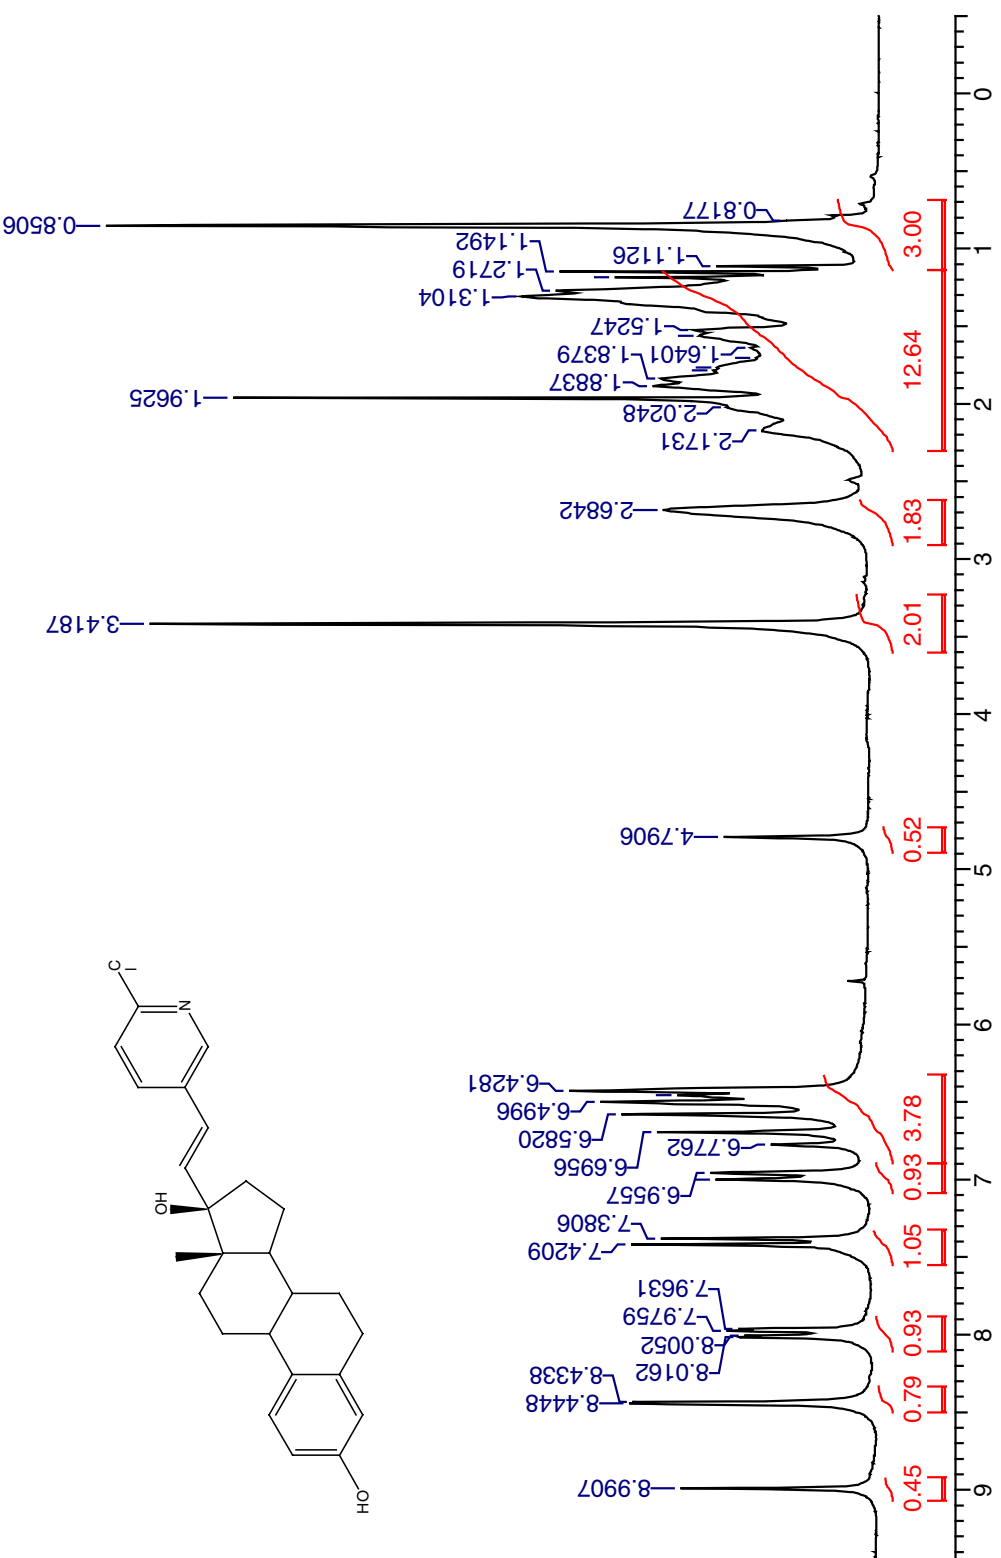

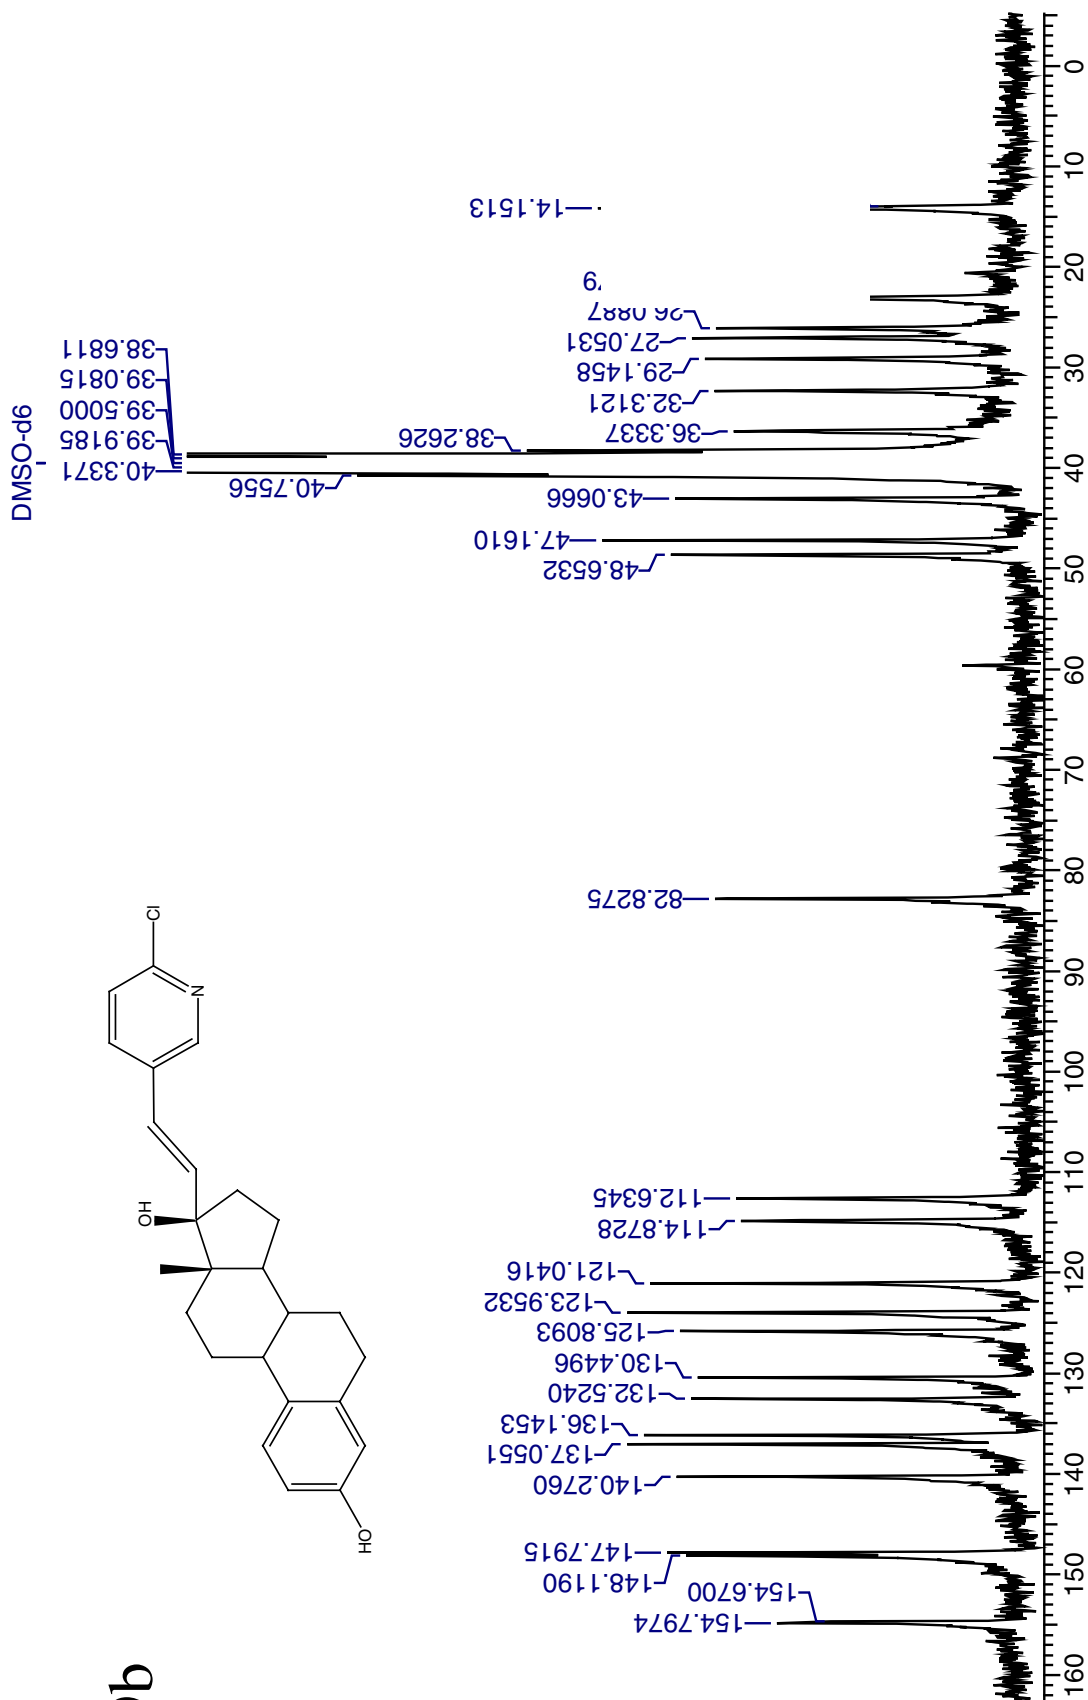

9b

12a

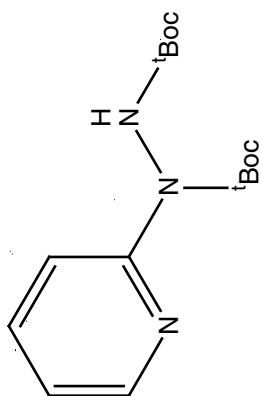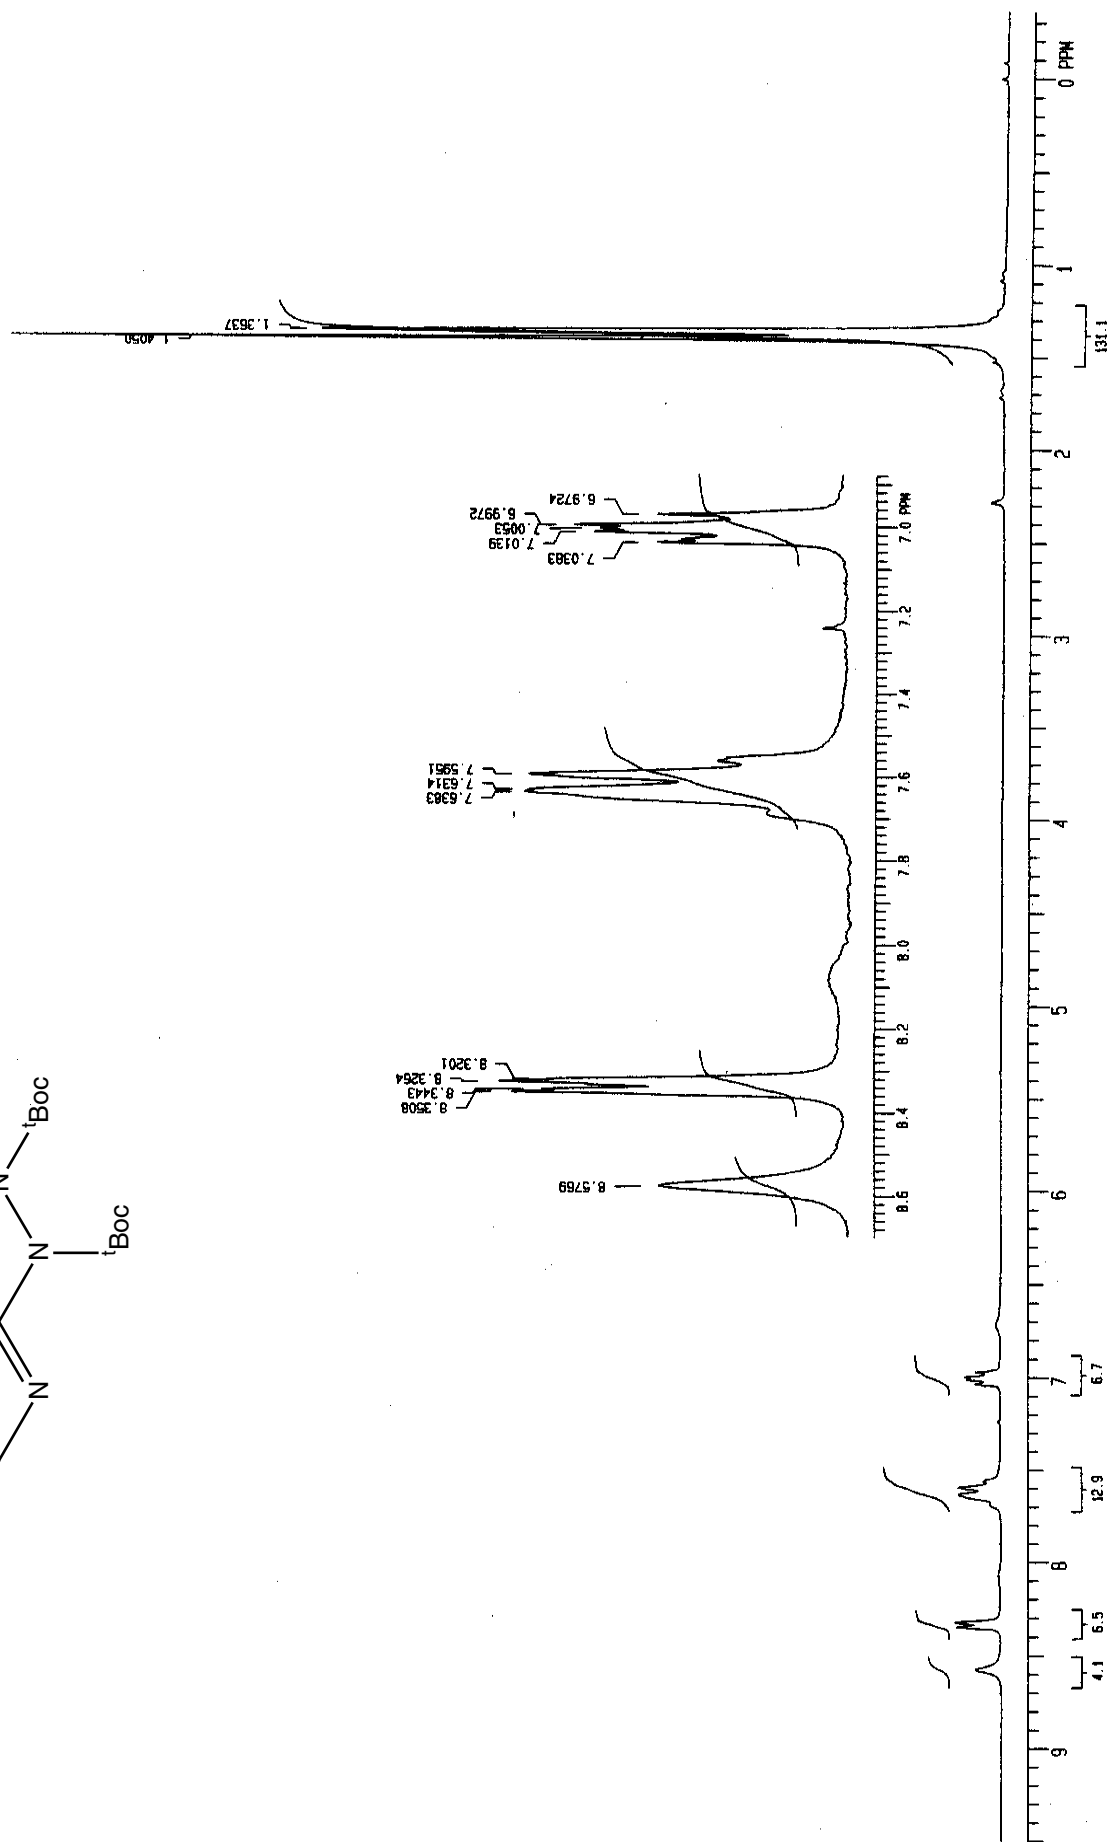

Cc1ccccc1N(C(=O)OC(C)(C)C)C(=O)OC(C)(C)C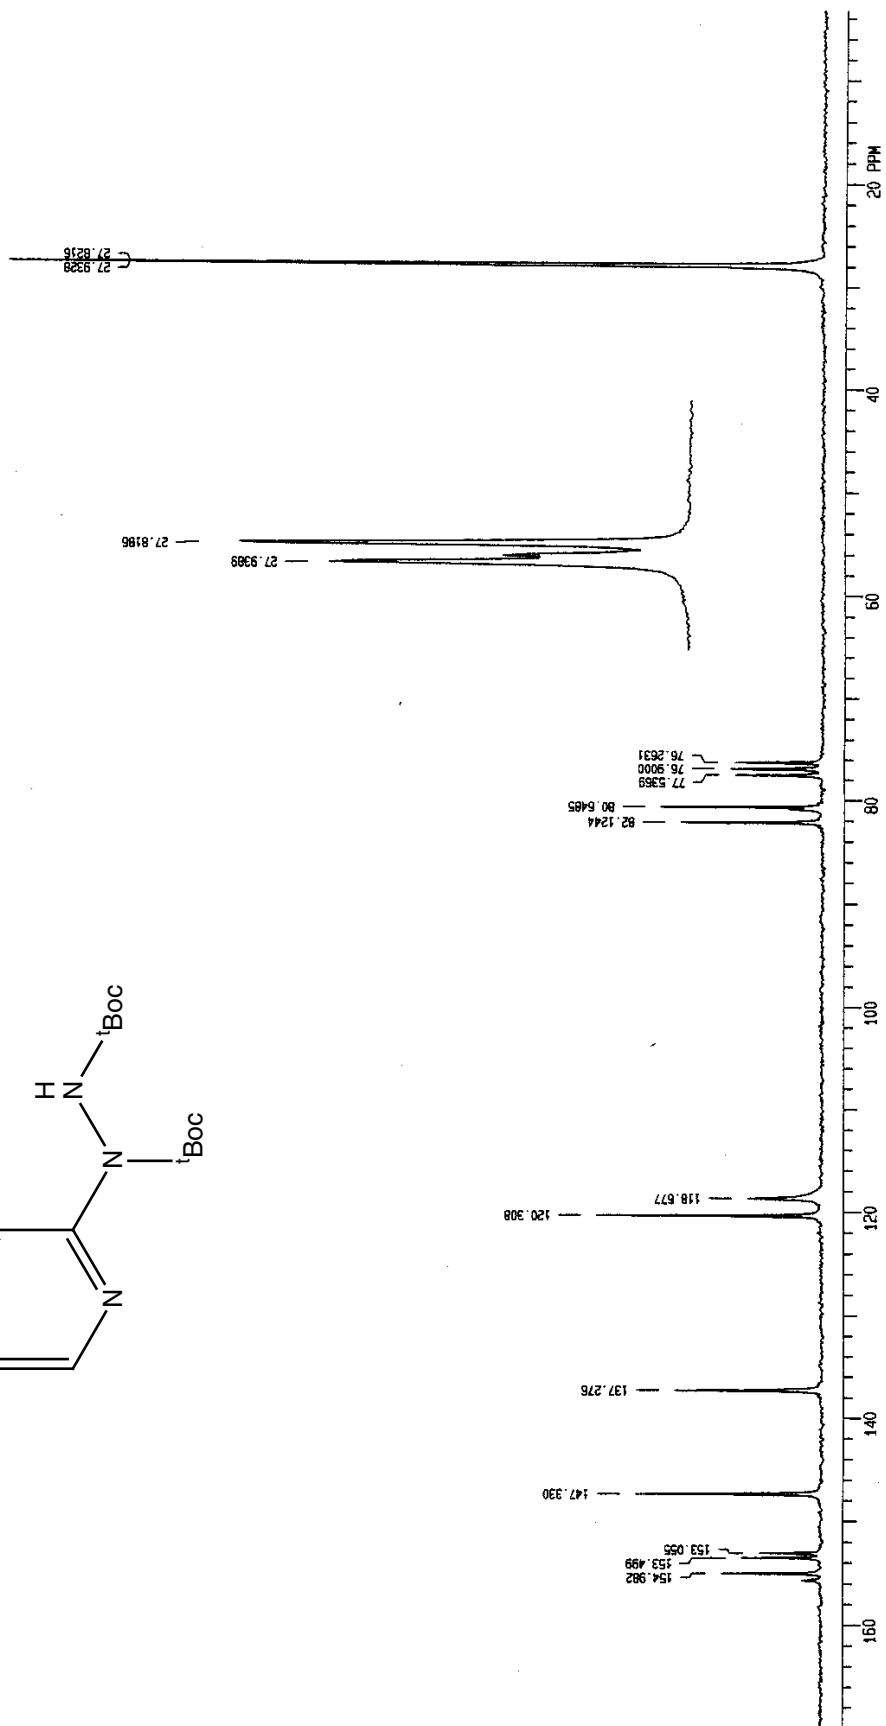

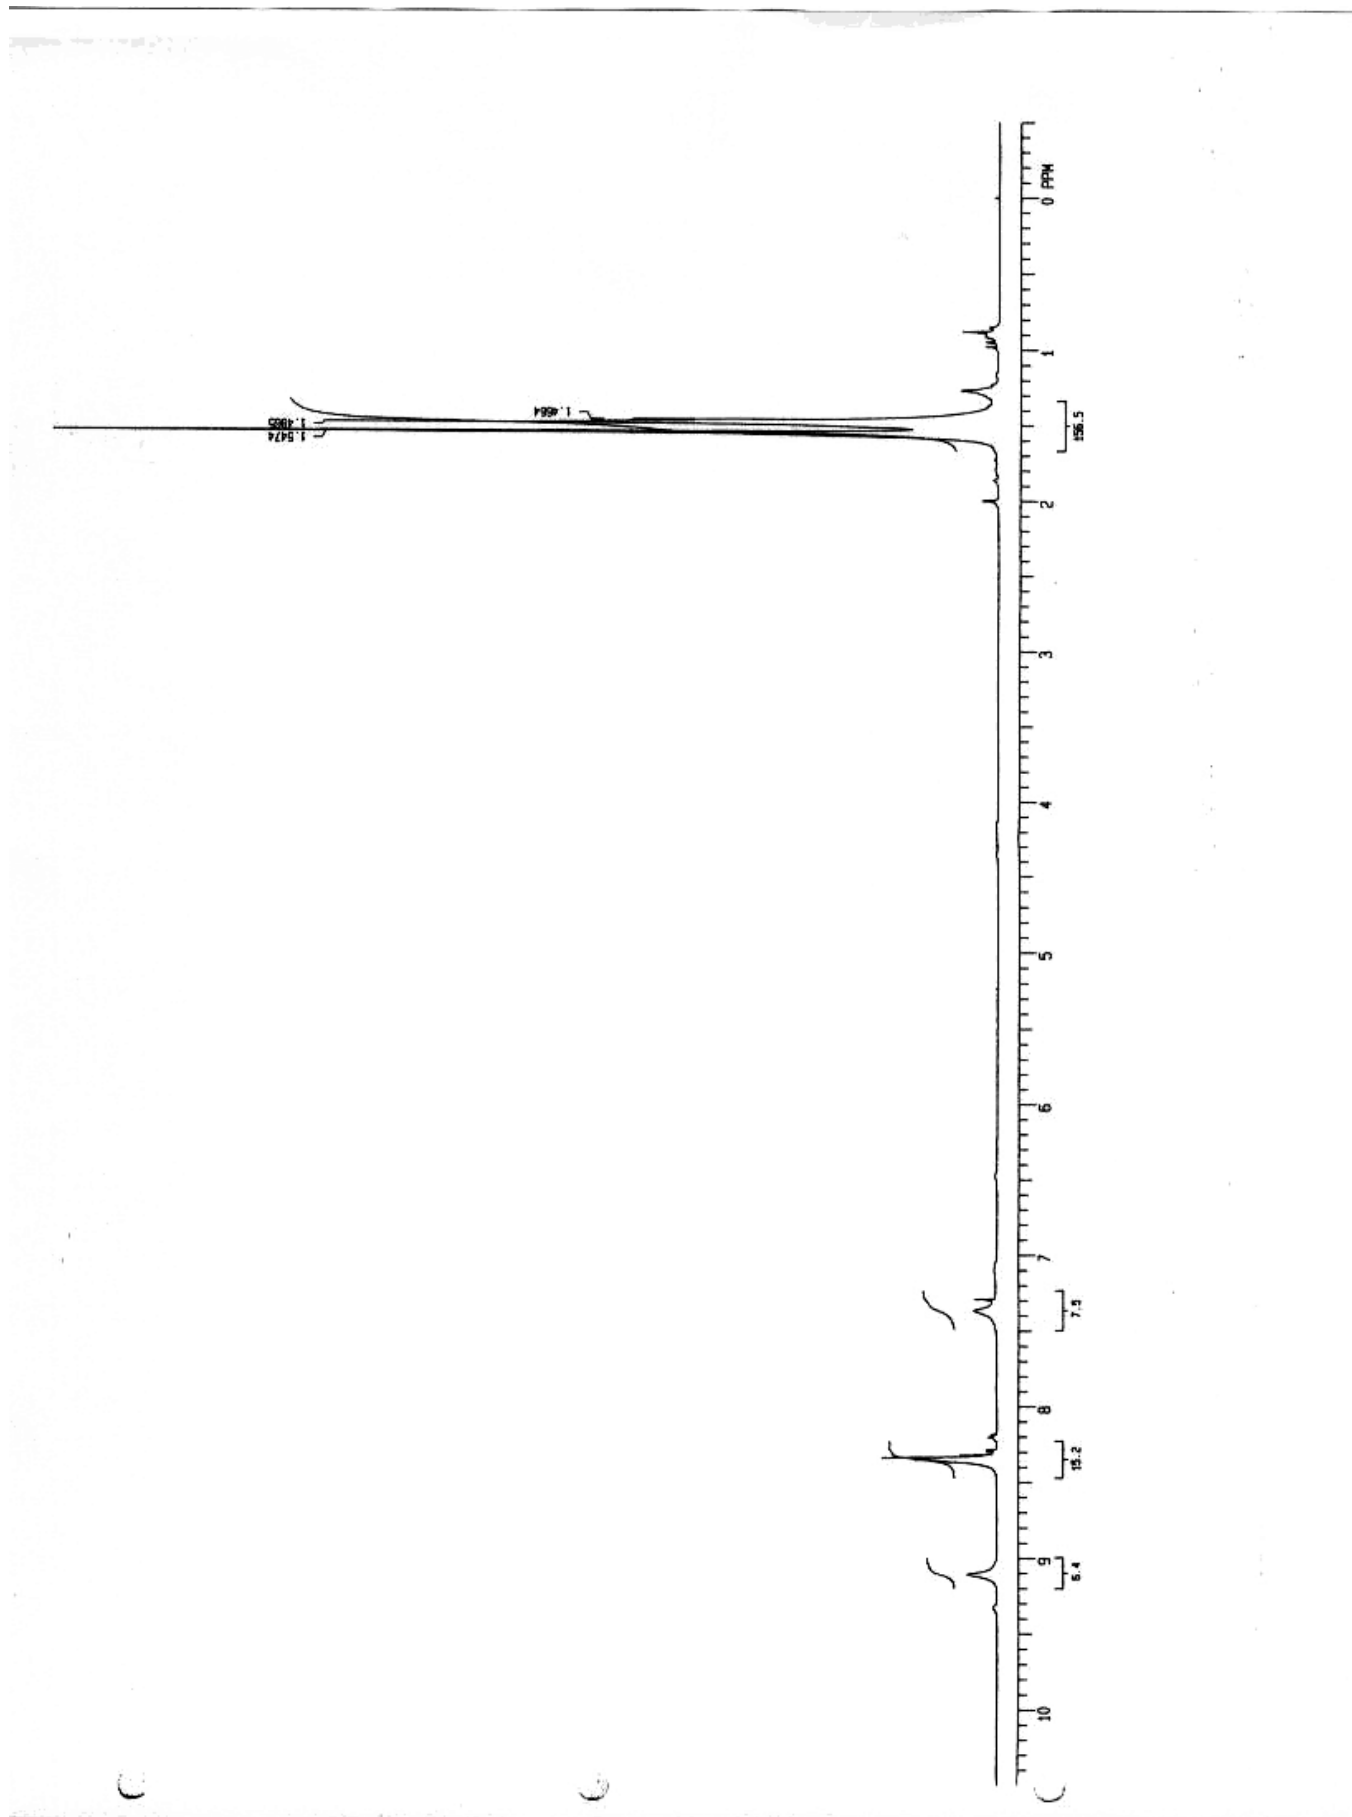

12d

12d

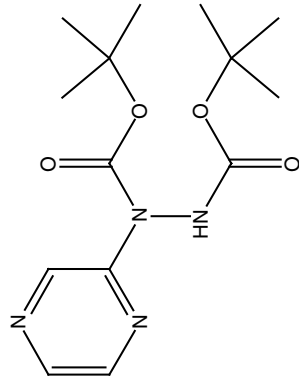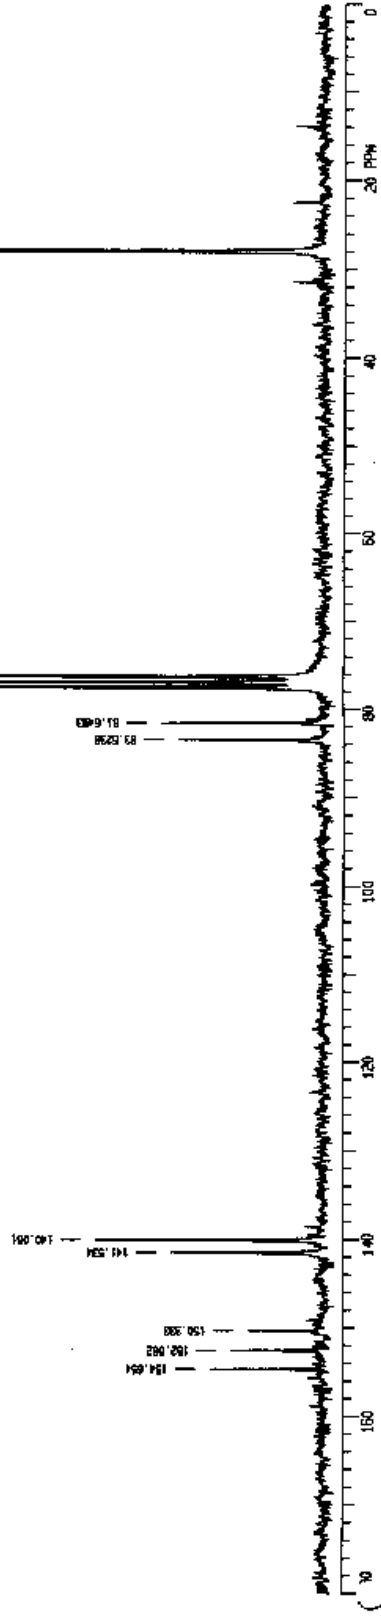



12e

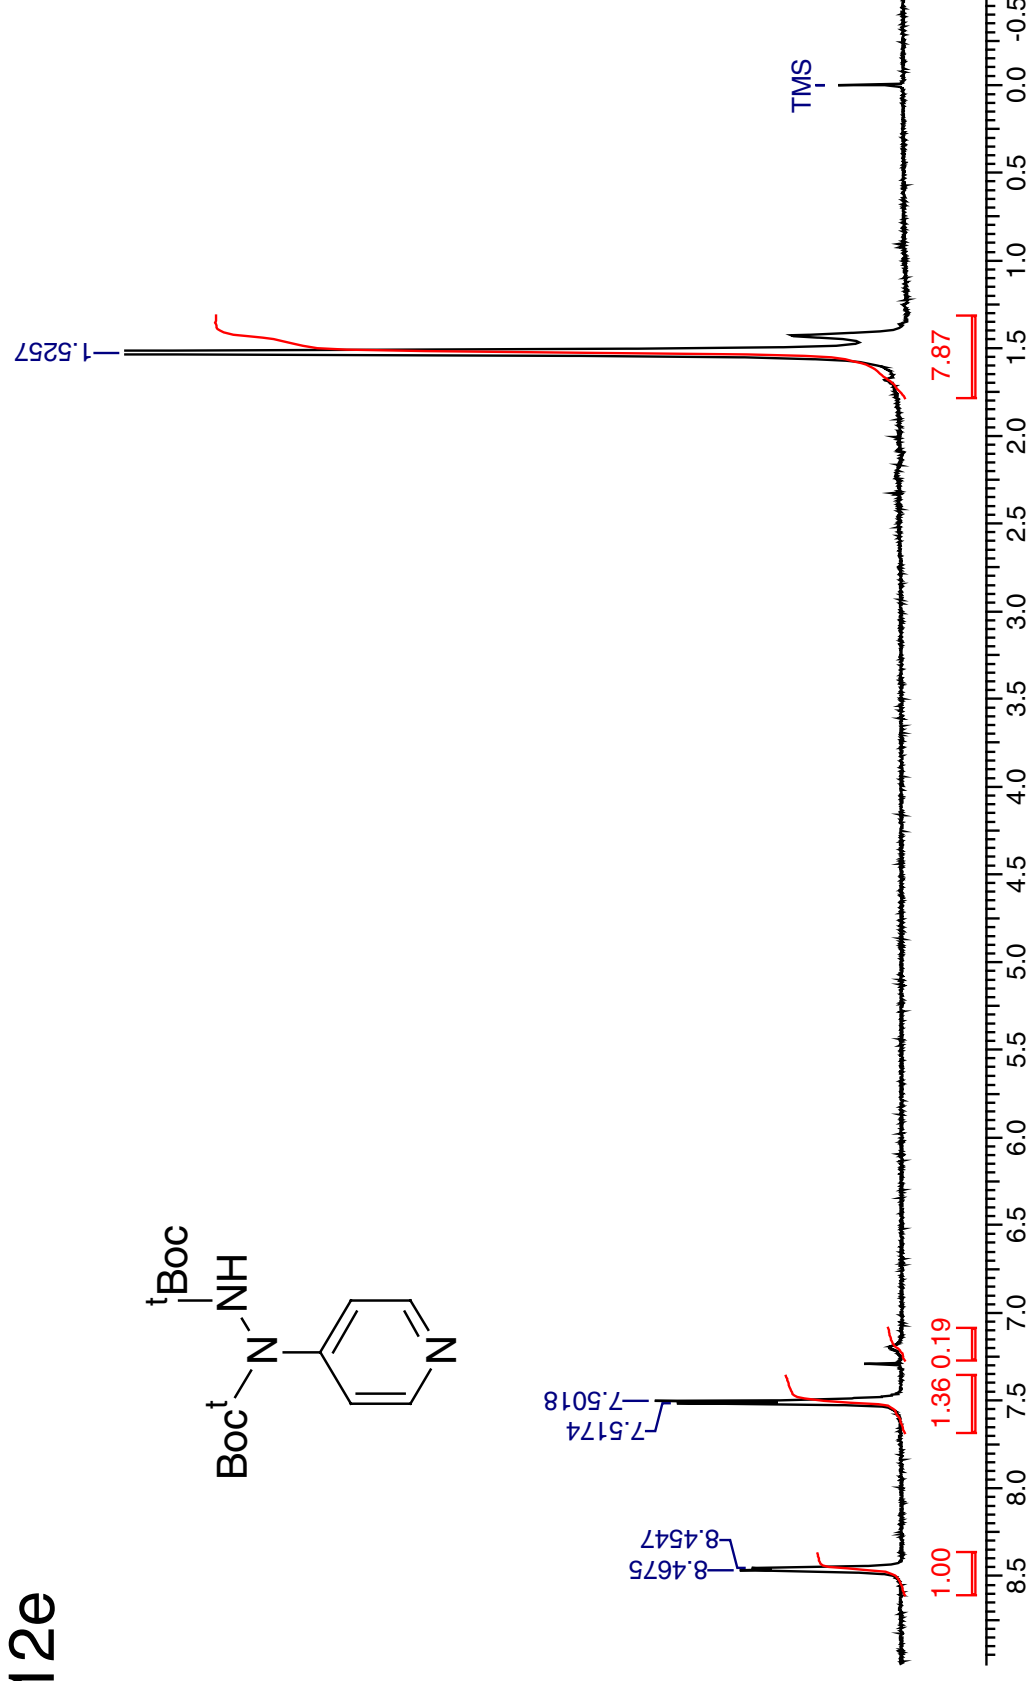

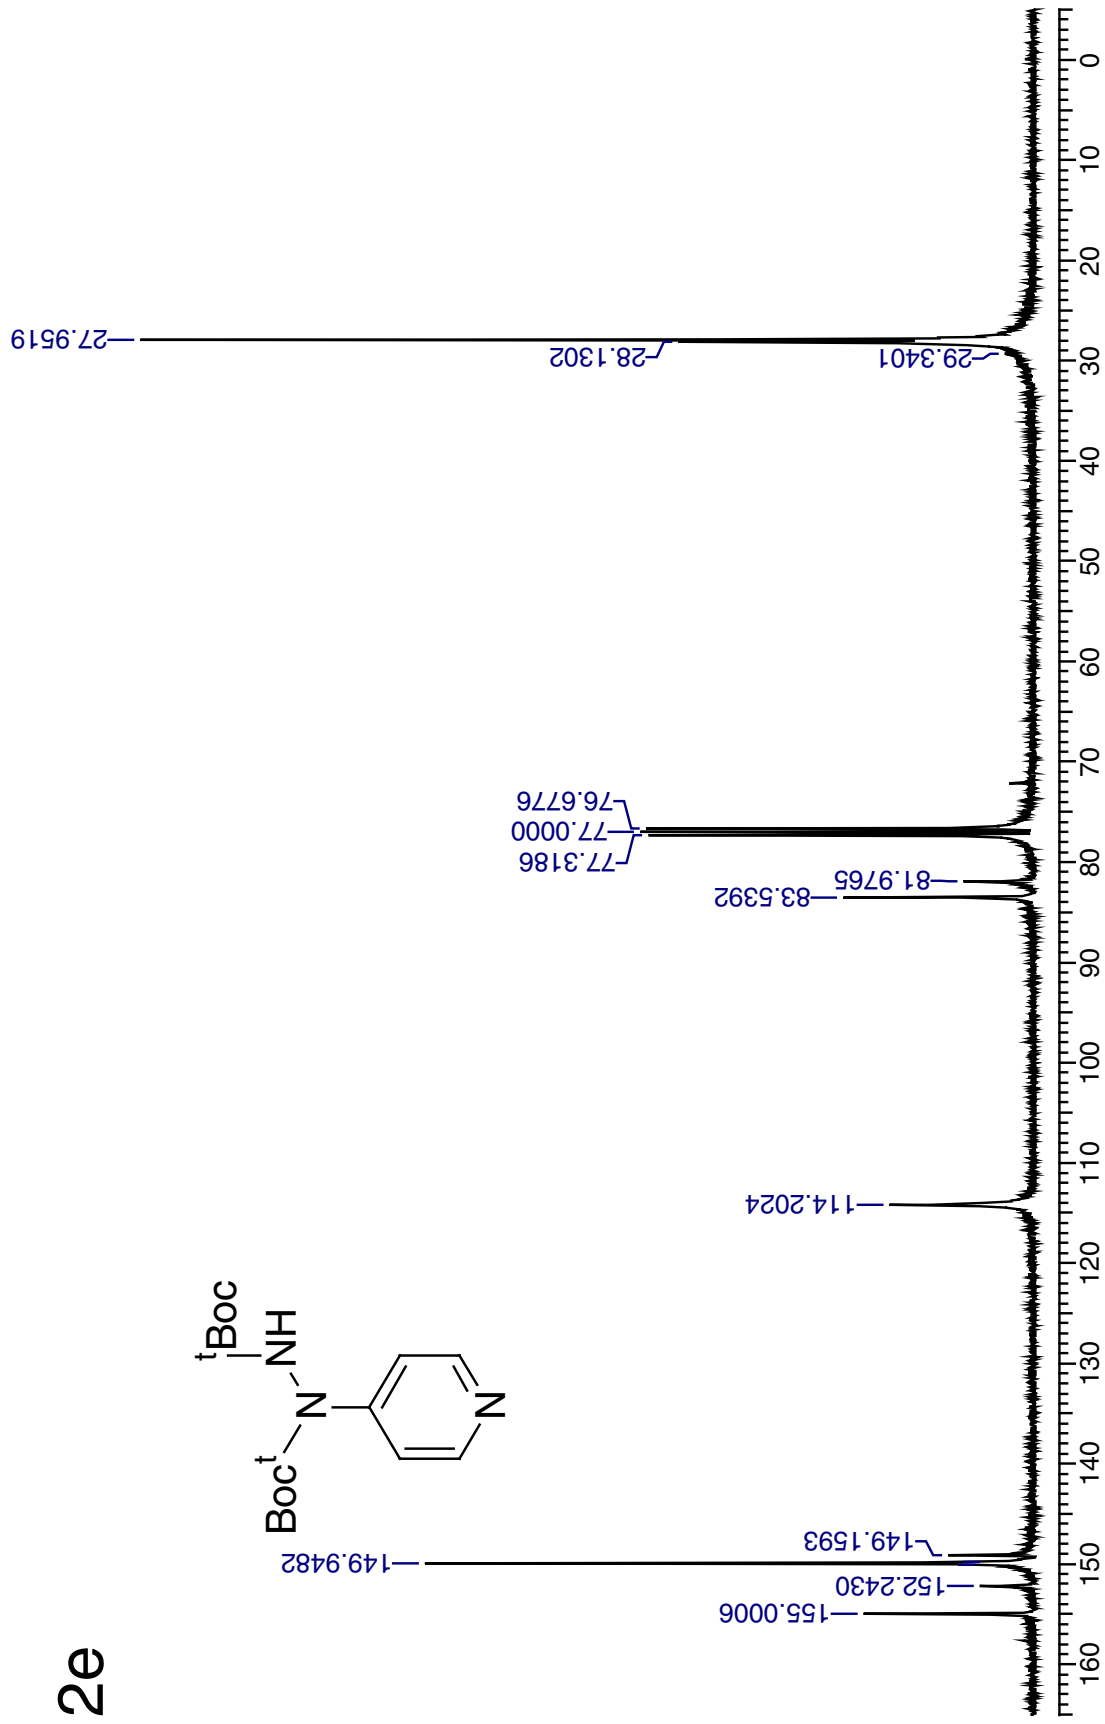

12i

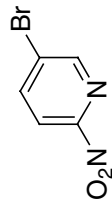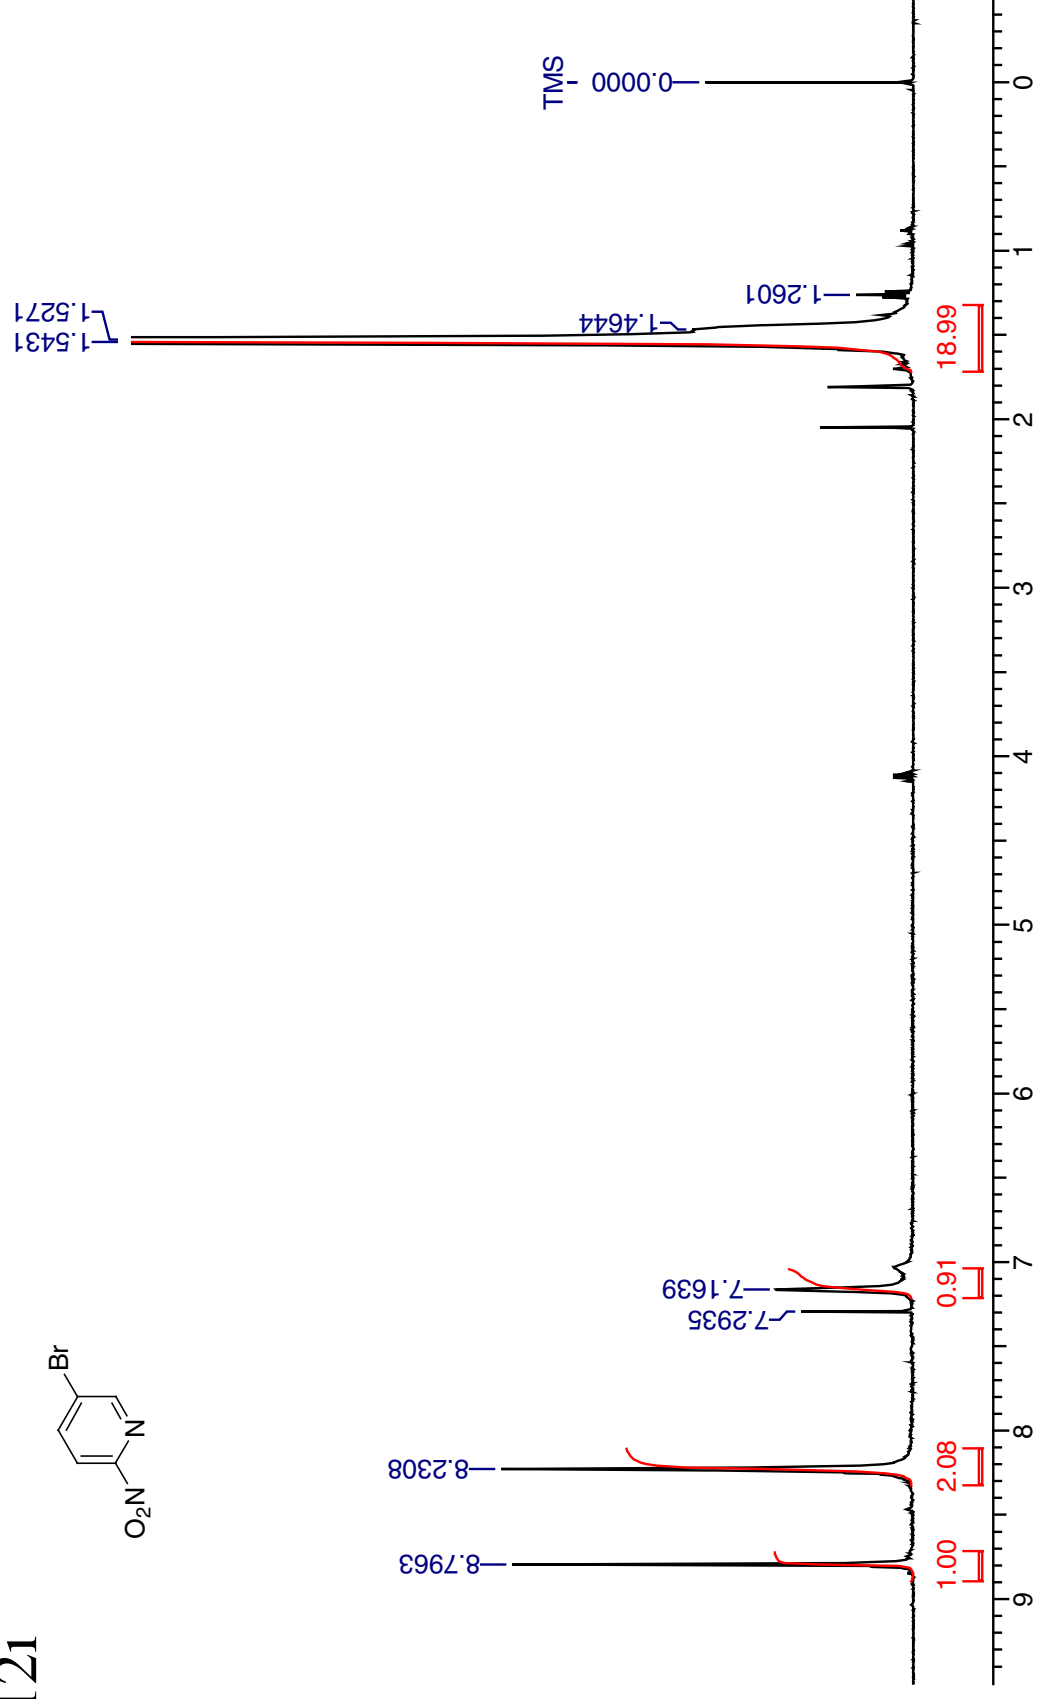

12i

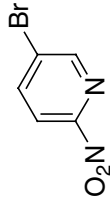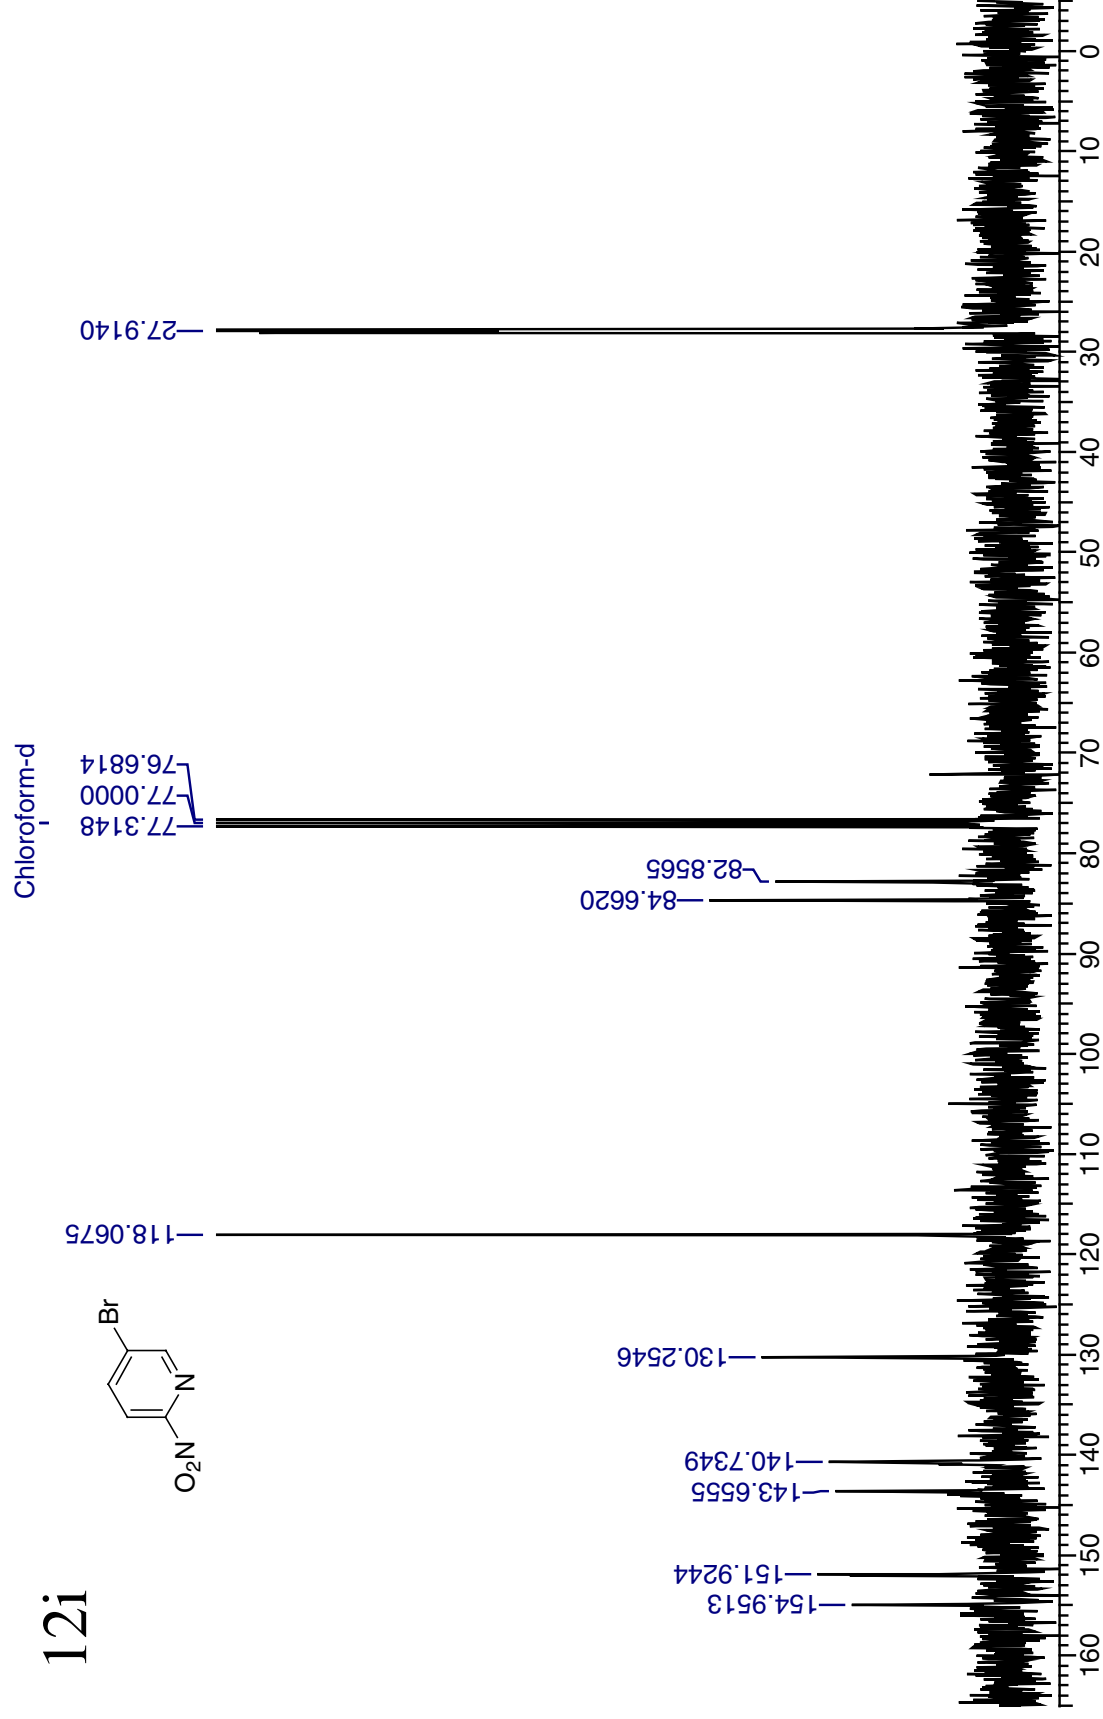

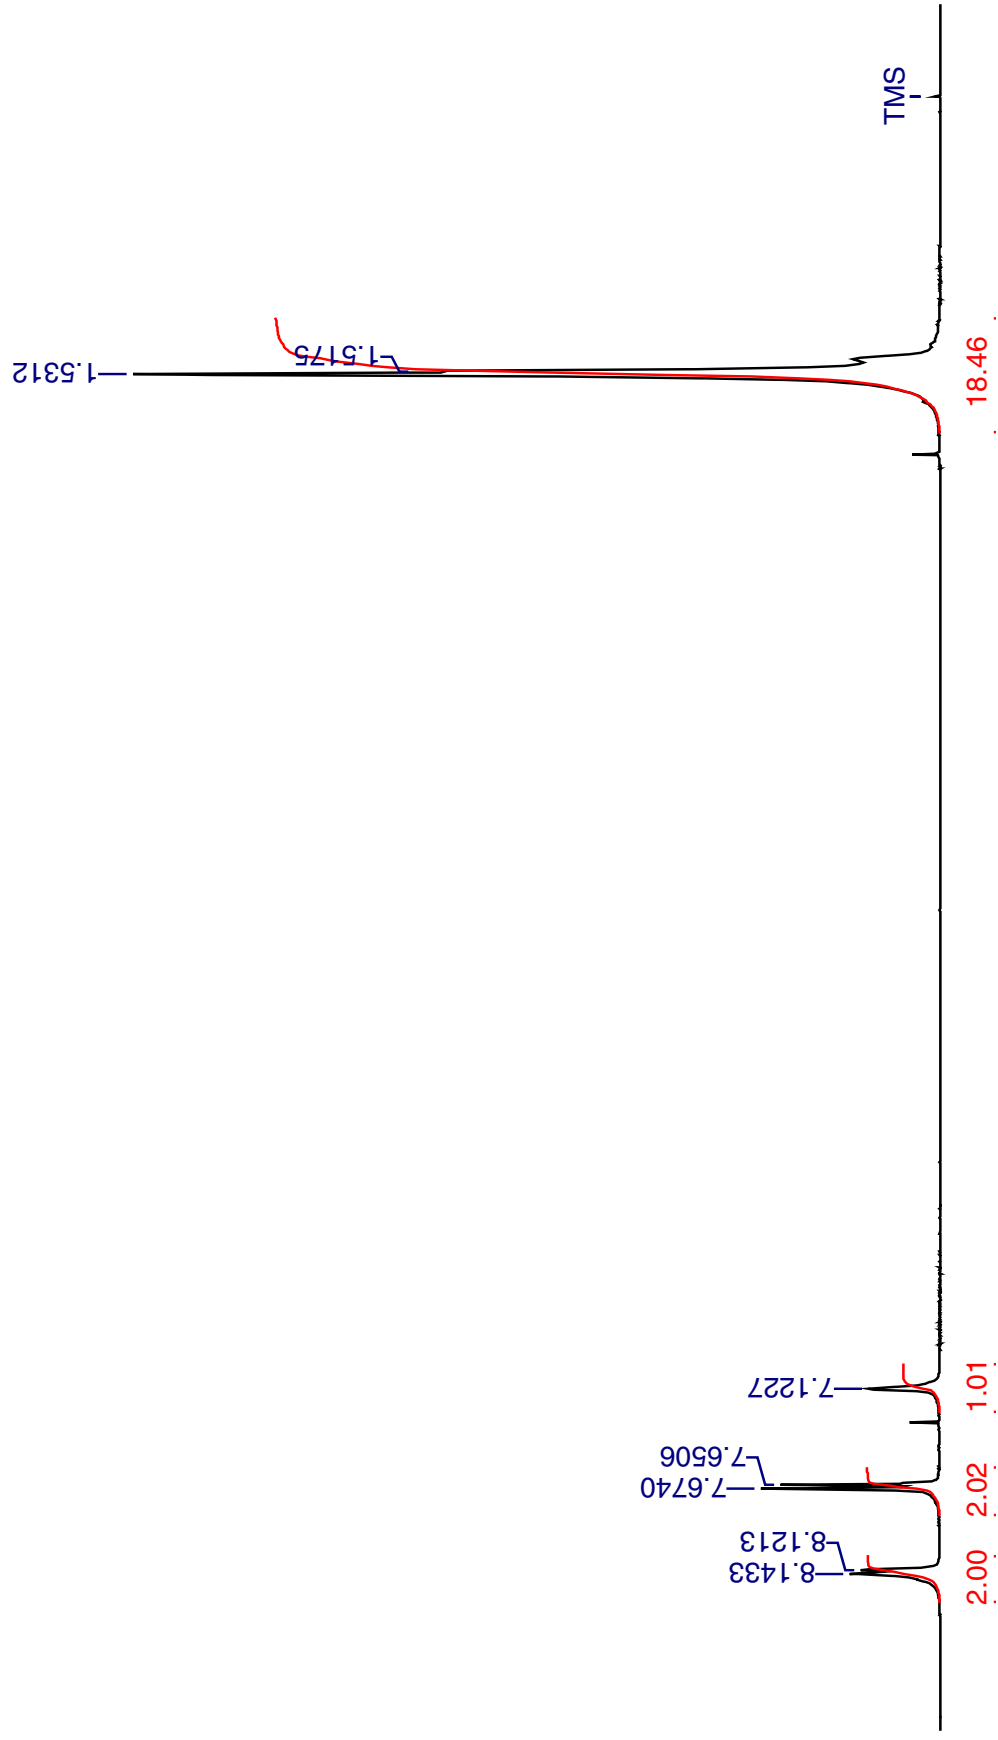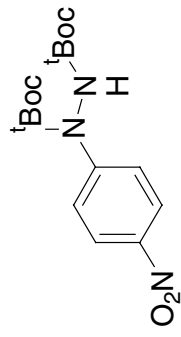

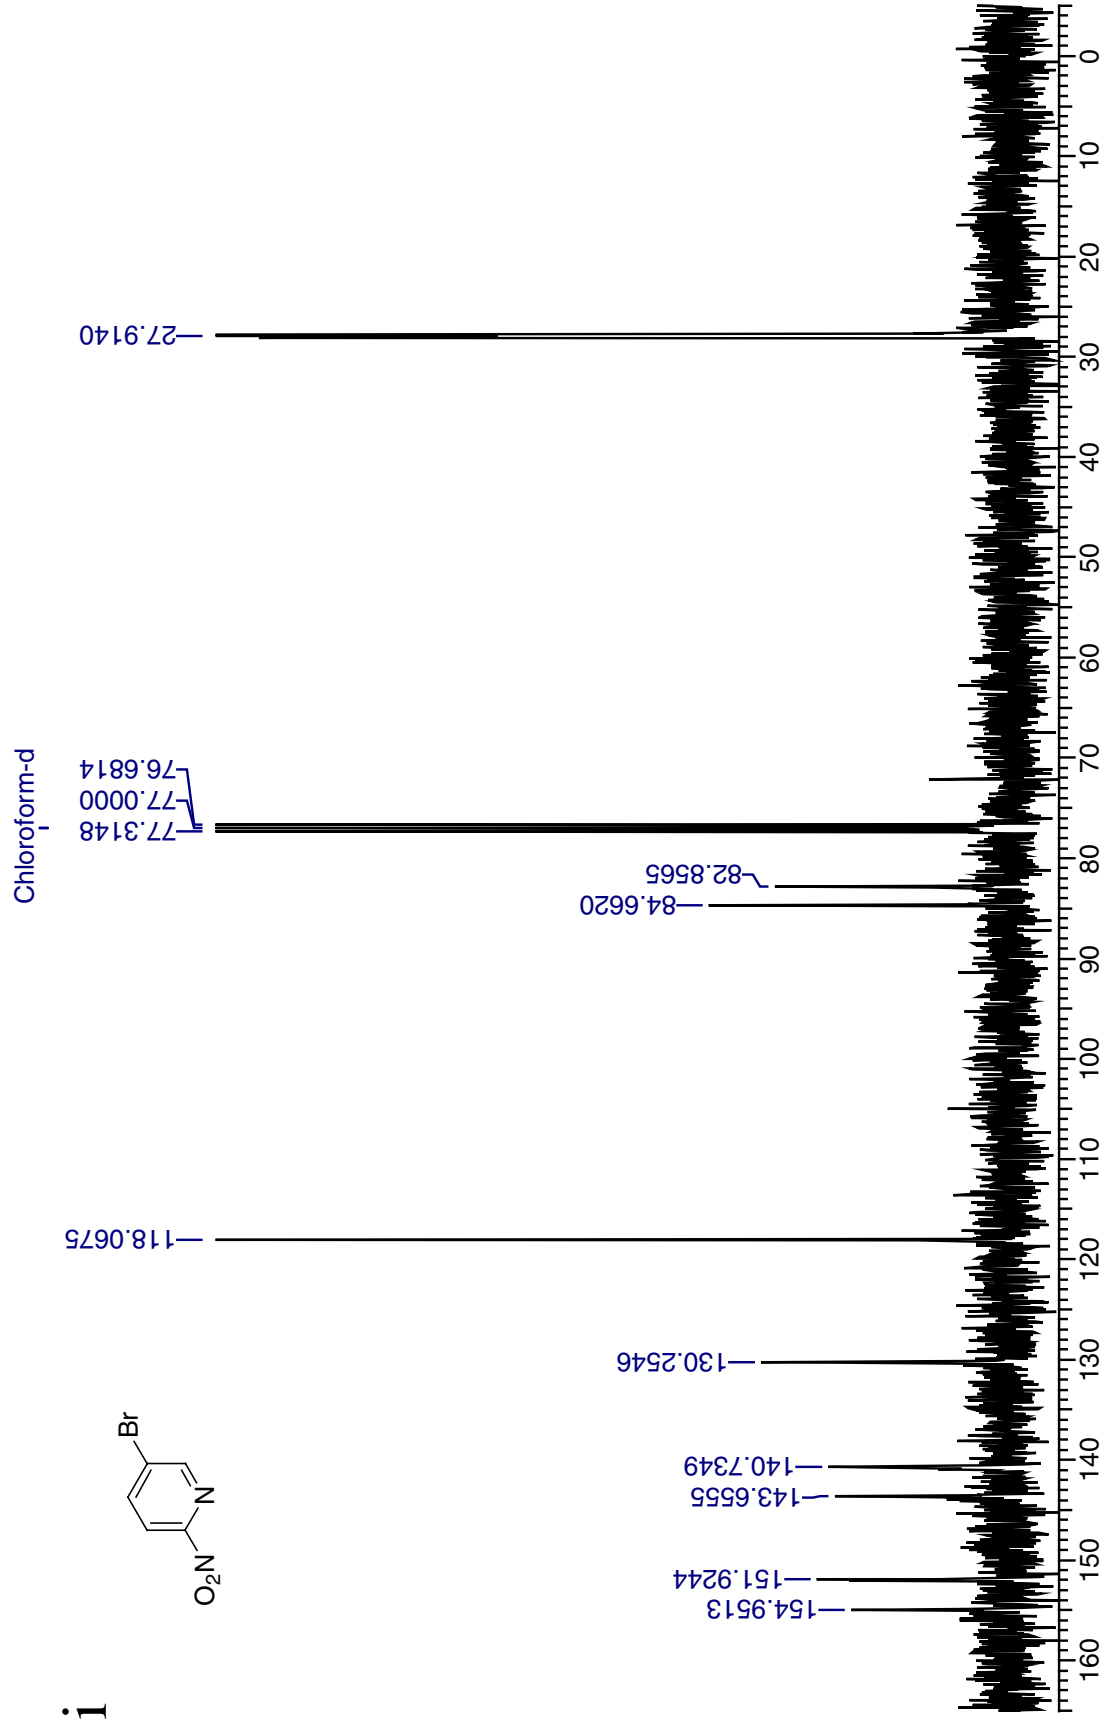

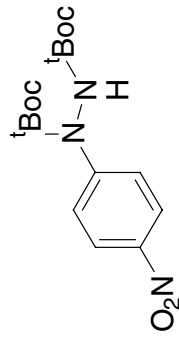

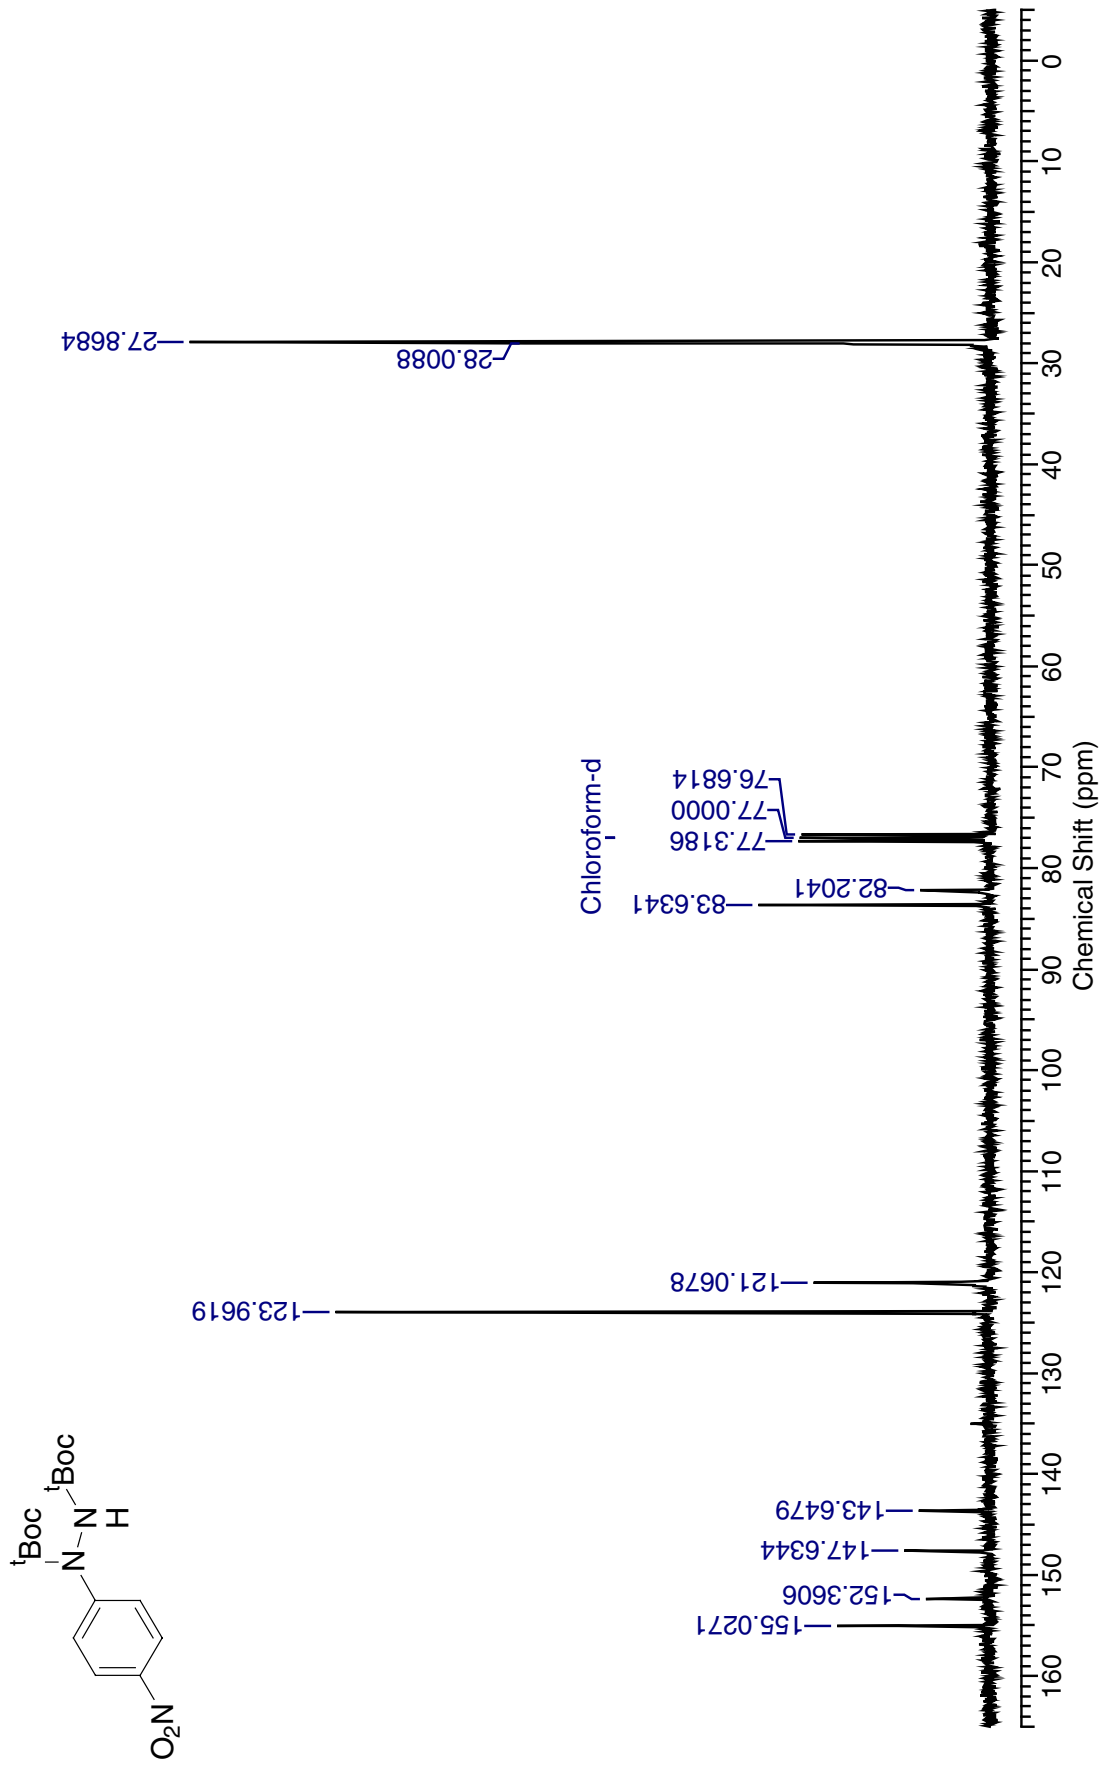



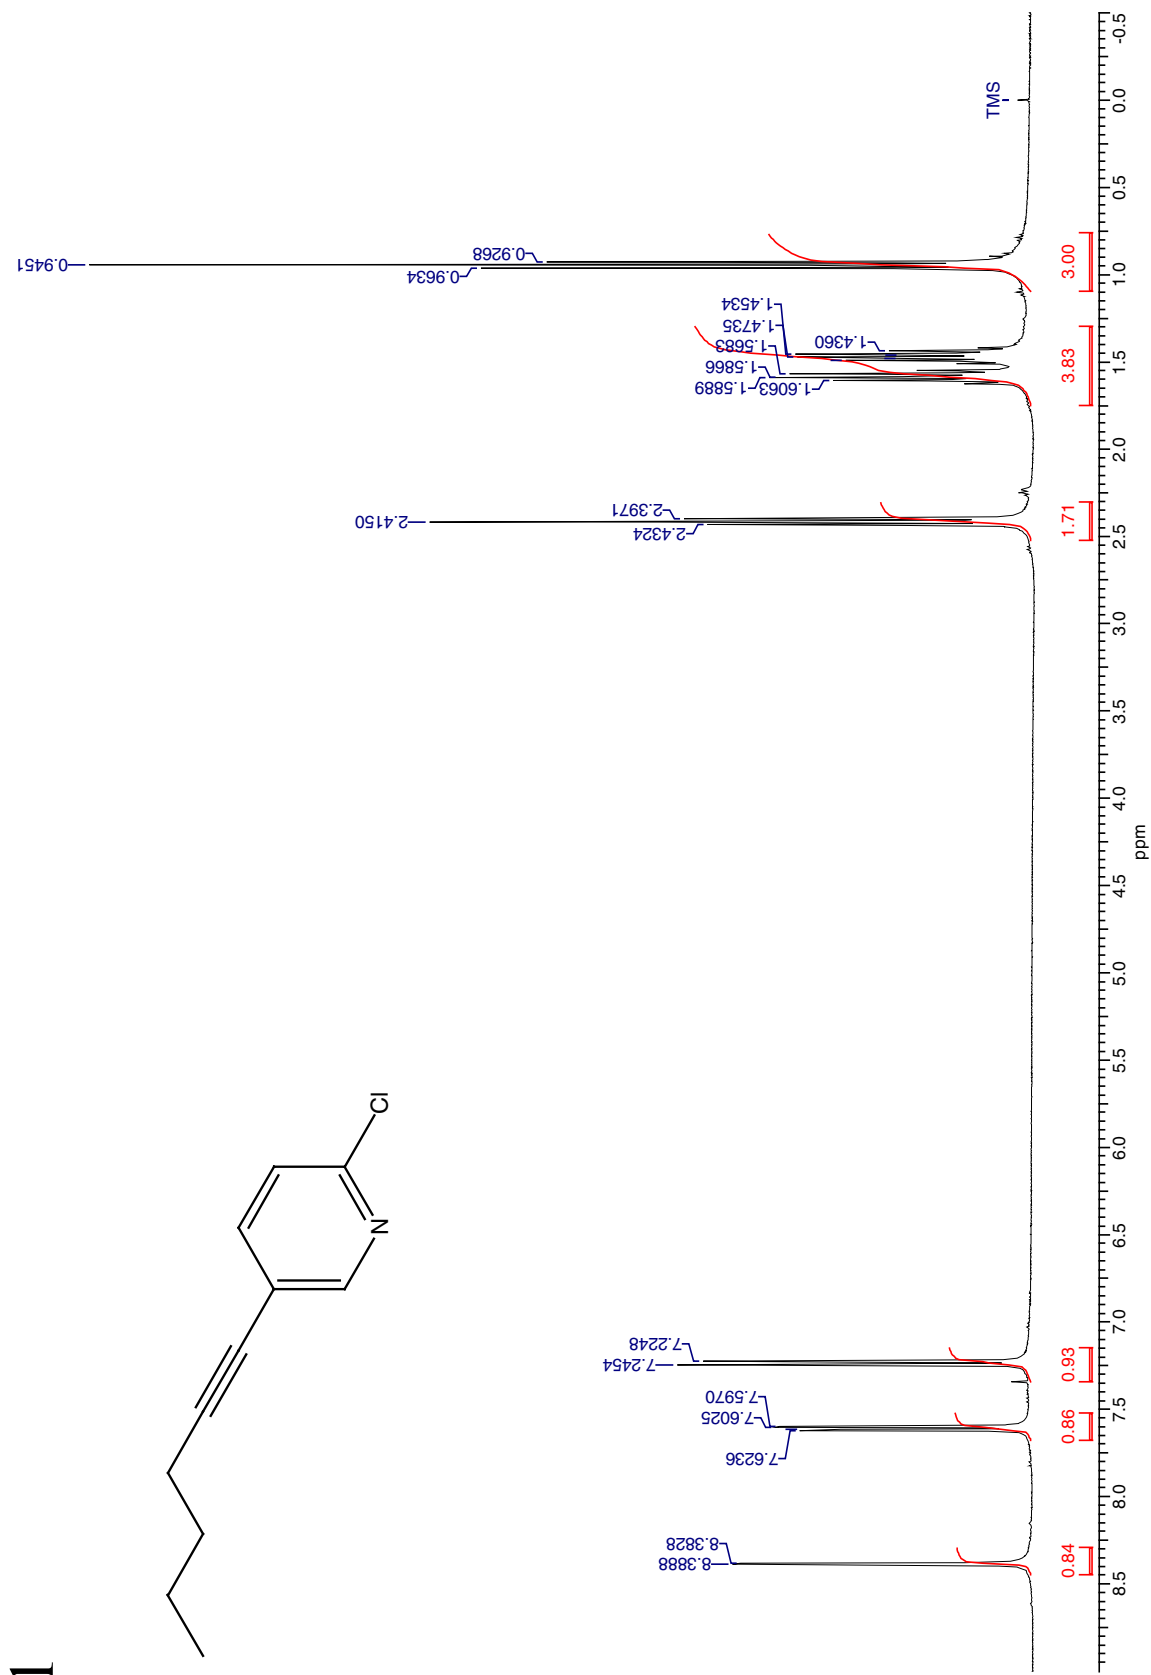

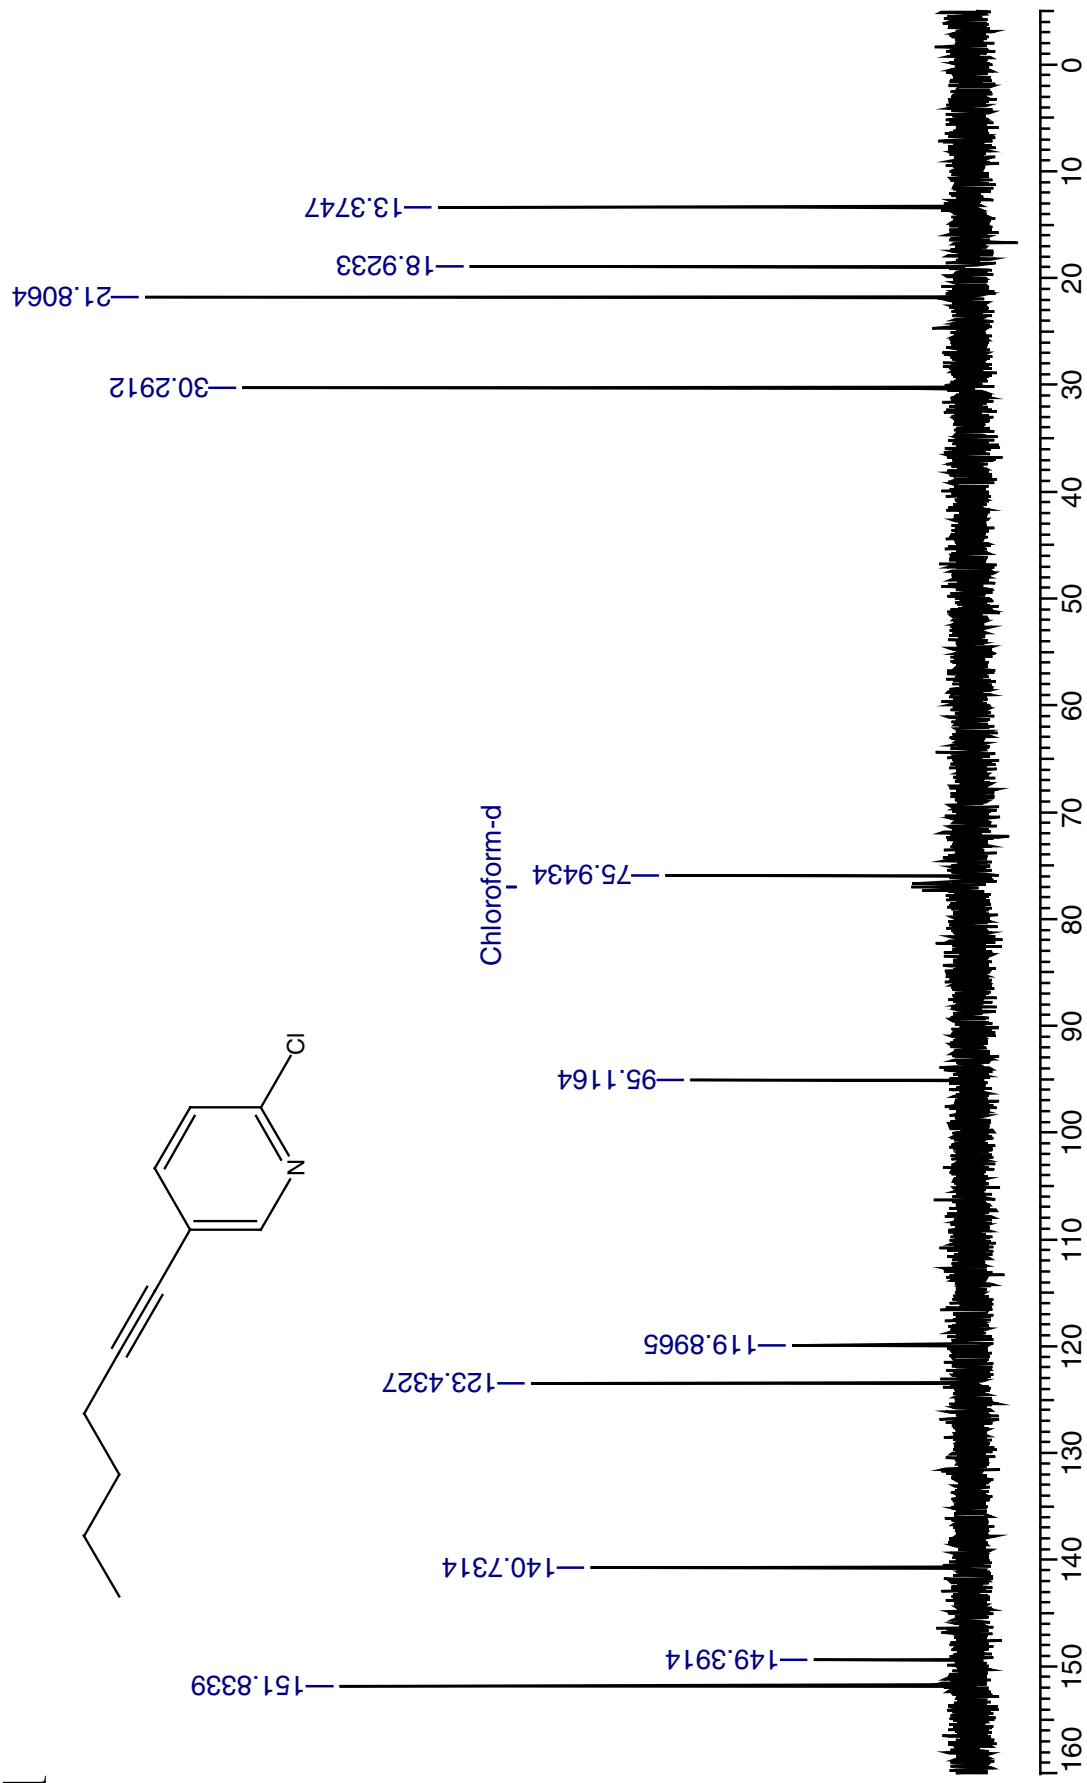

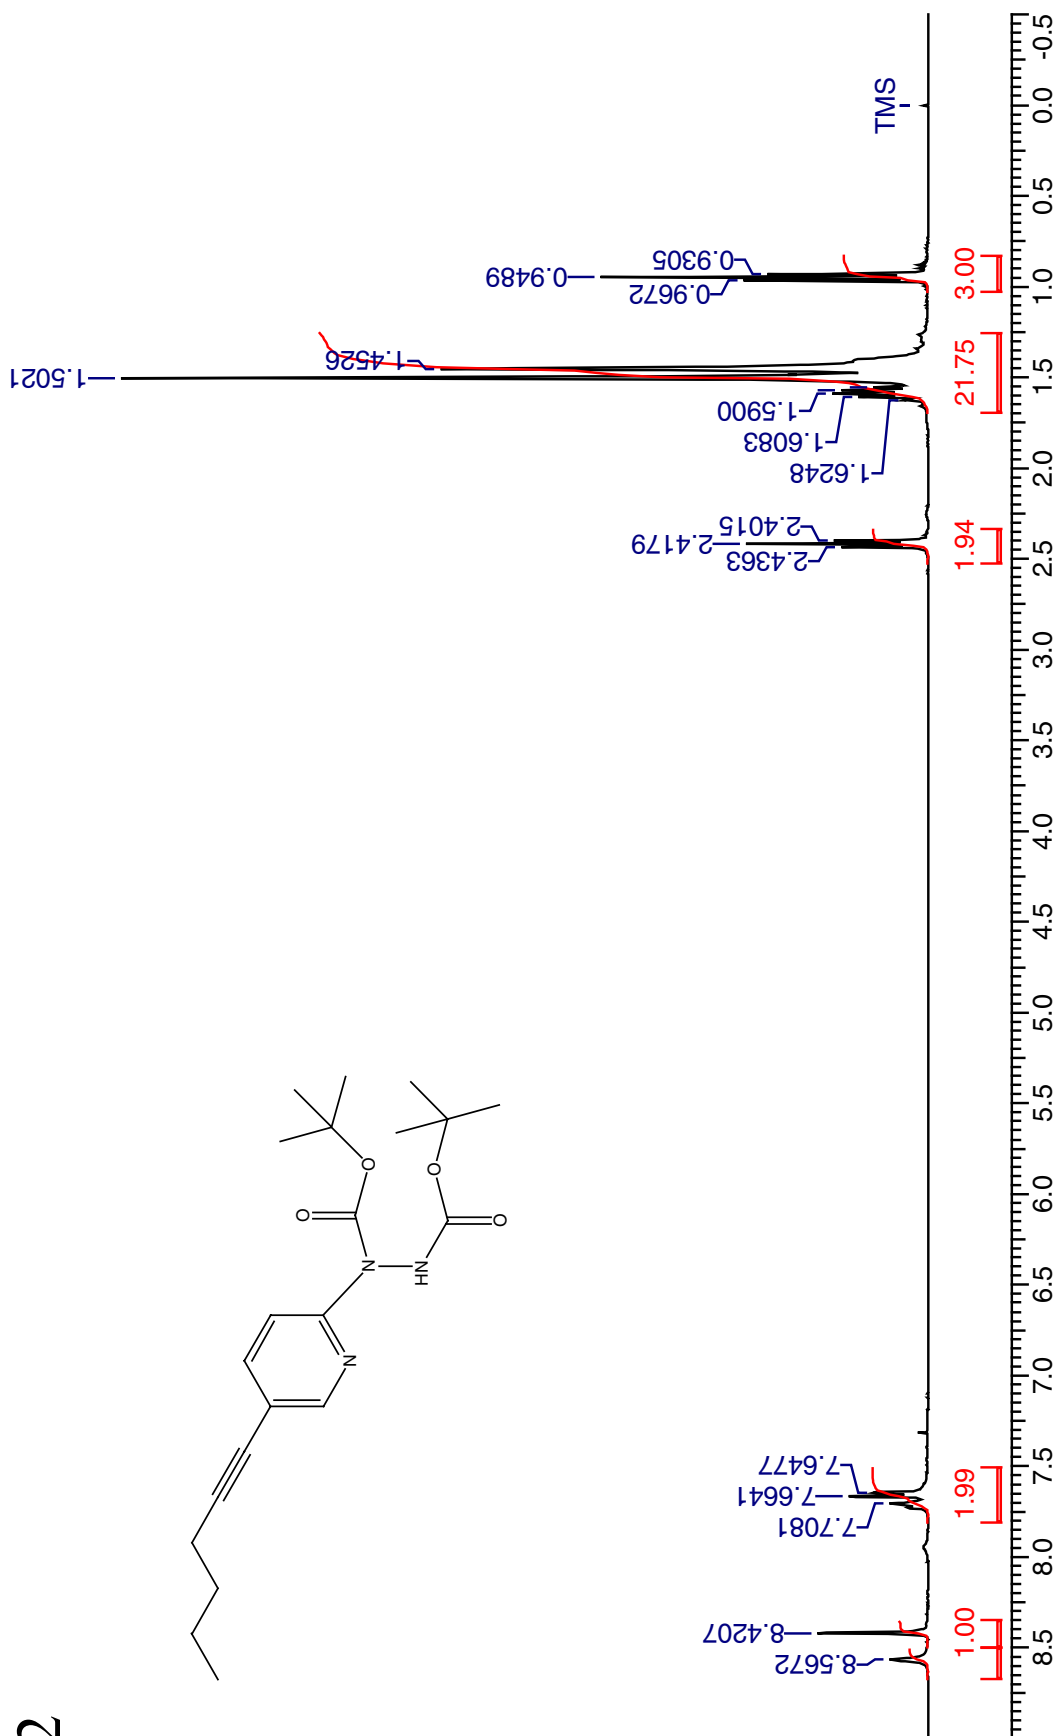

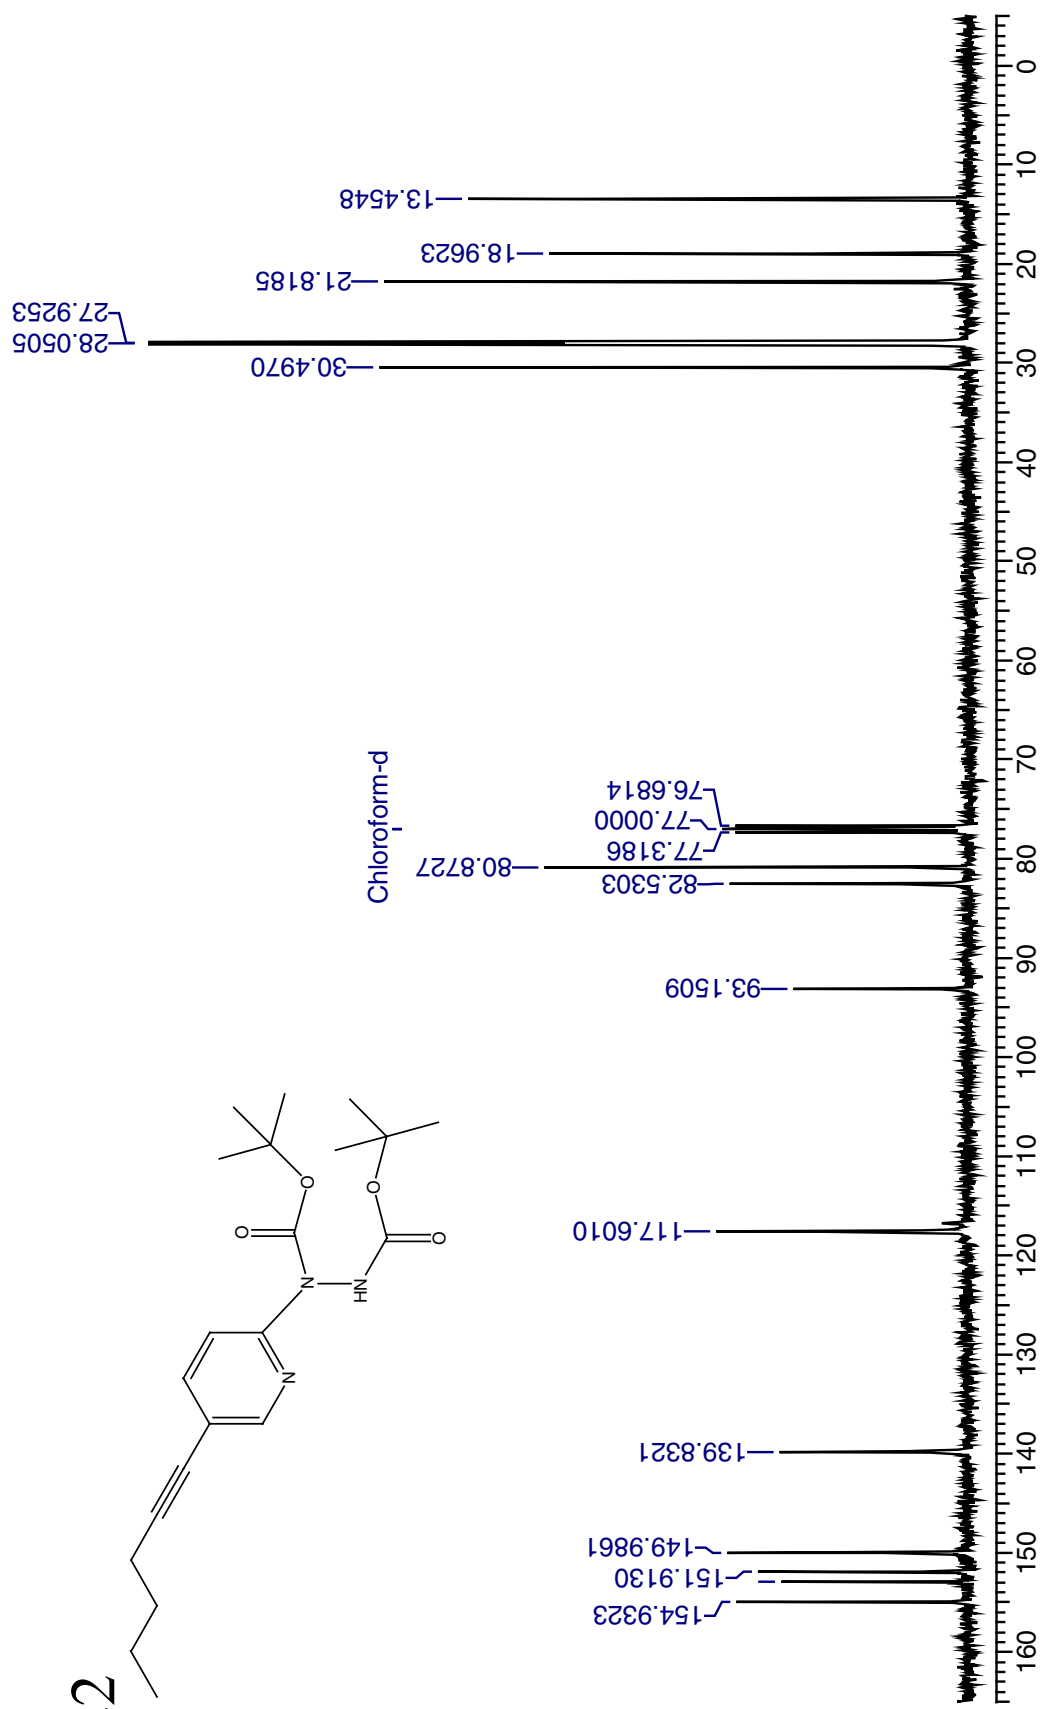

10 Apr 2003

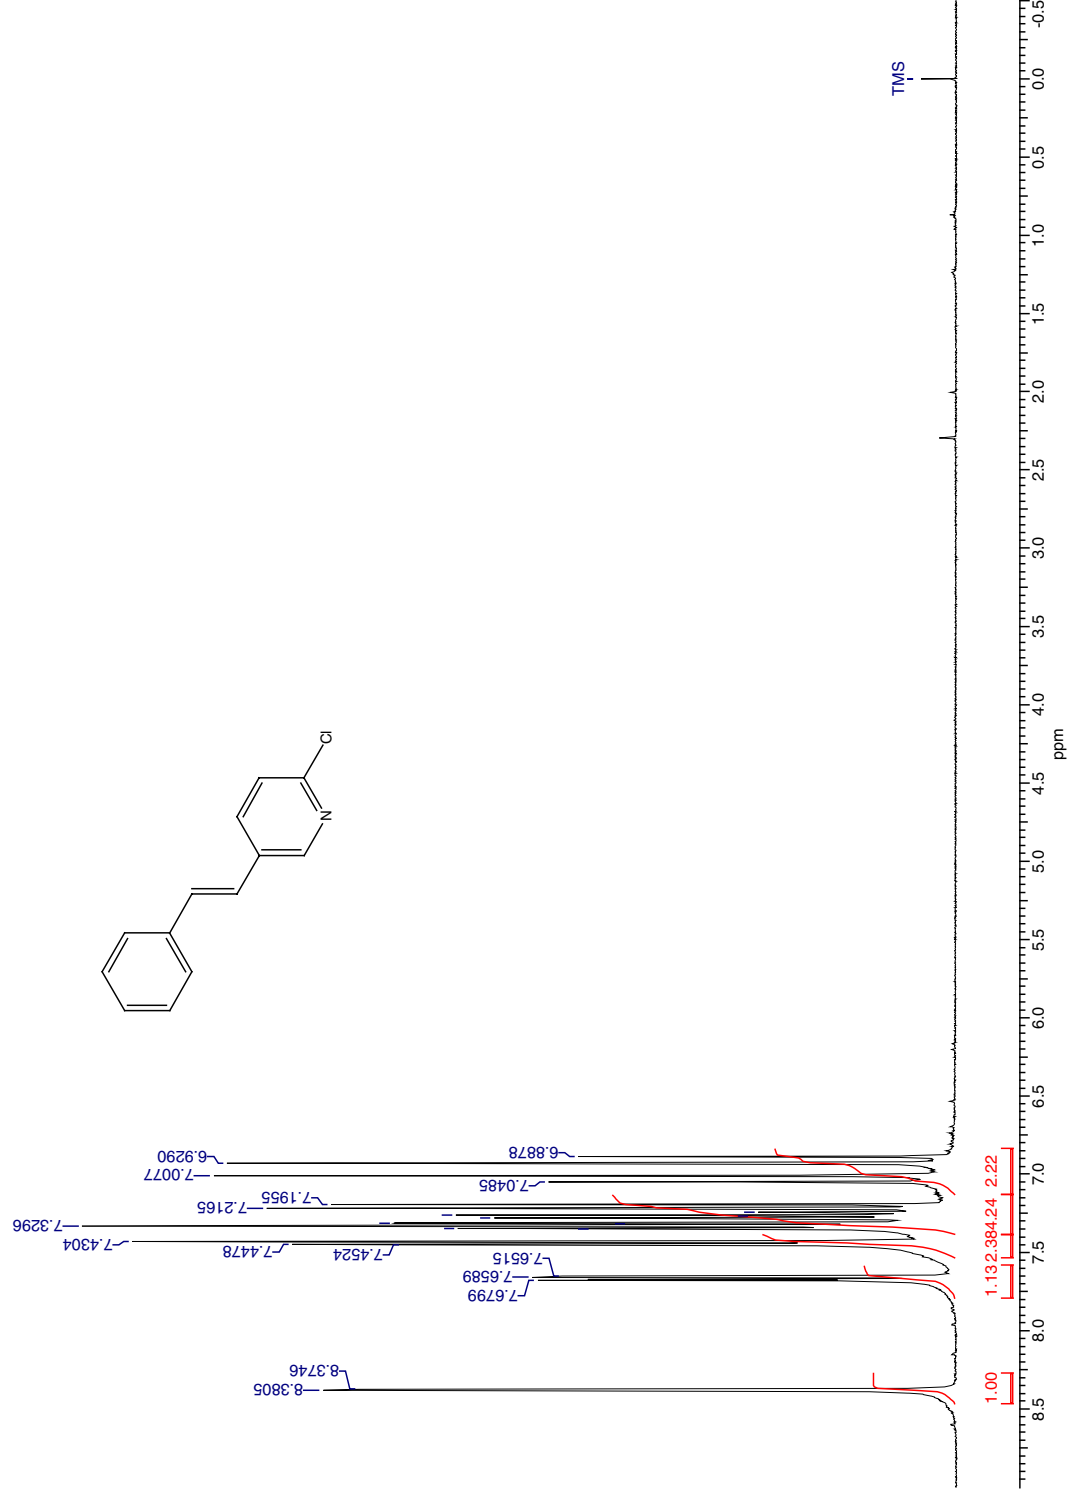

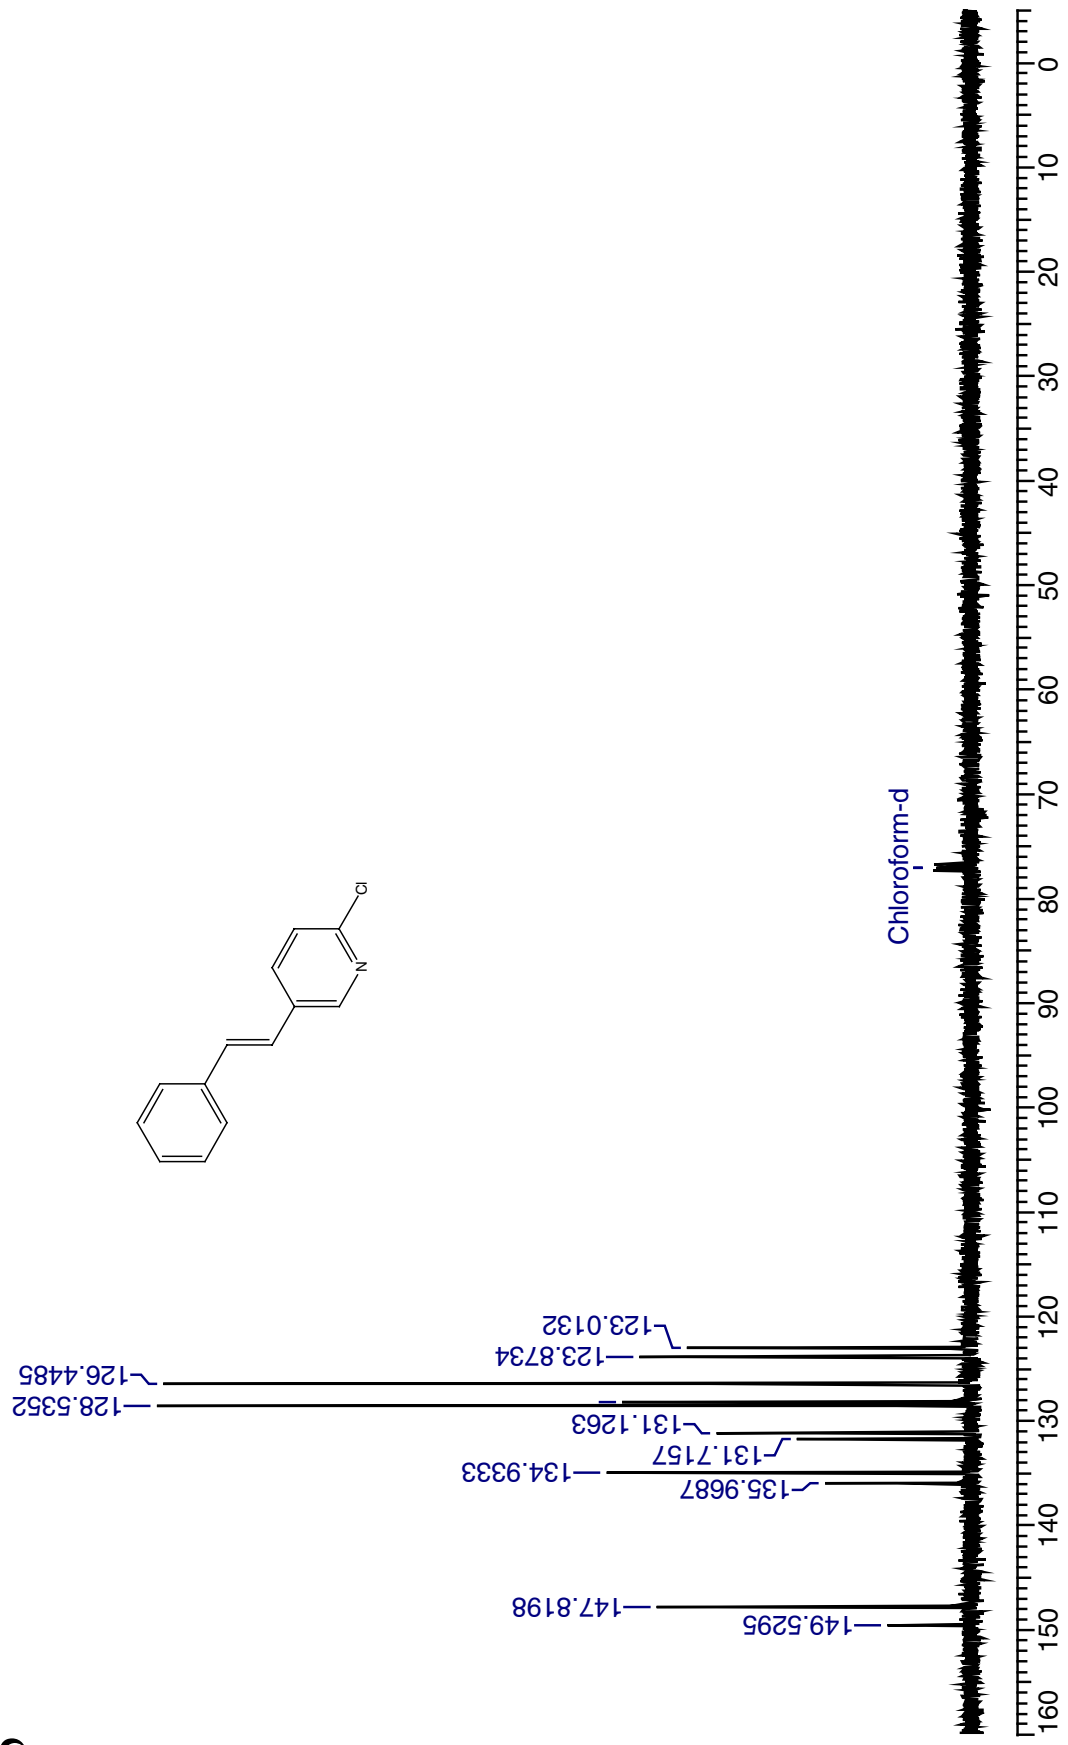

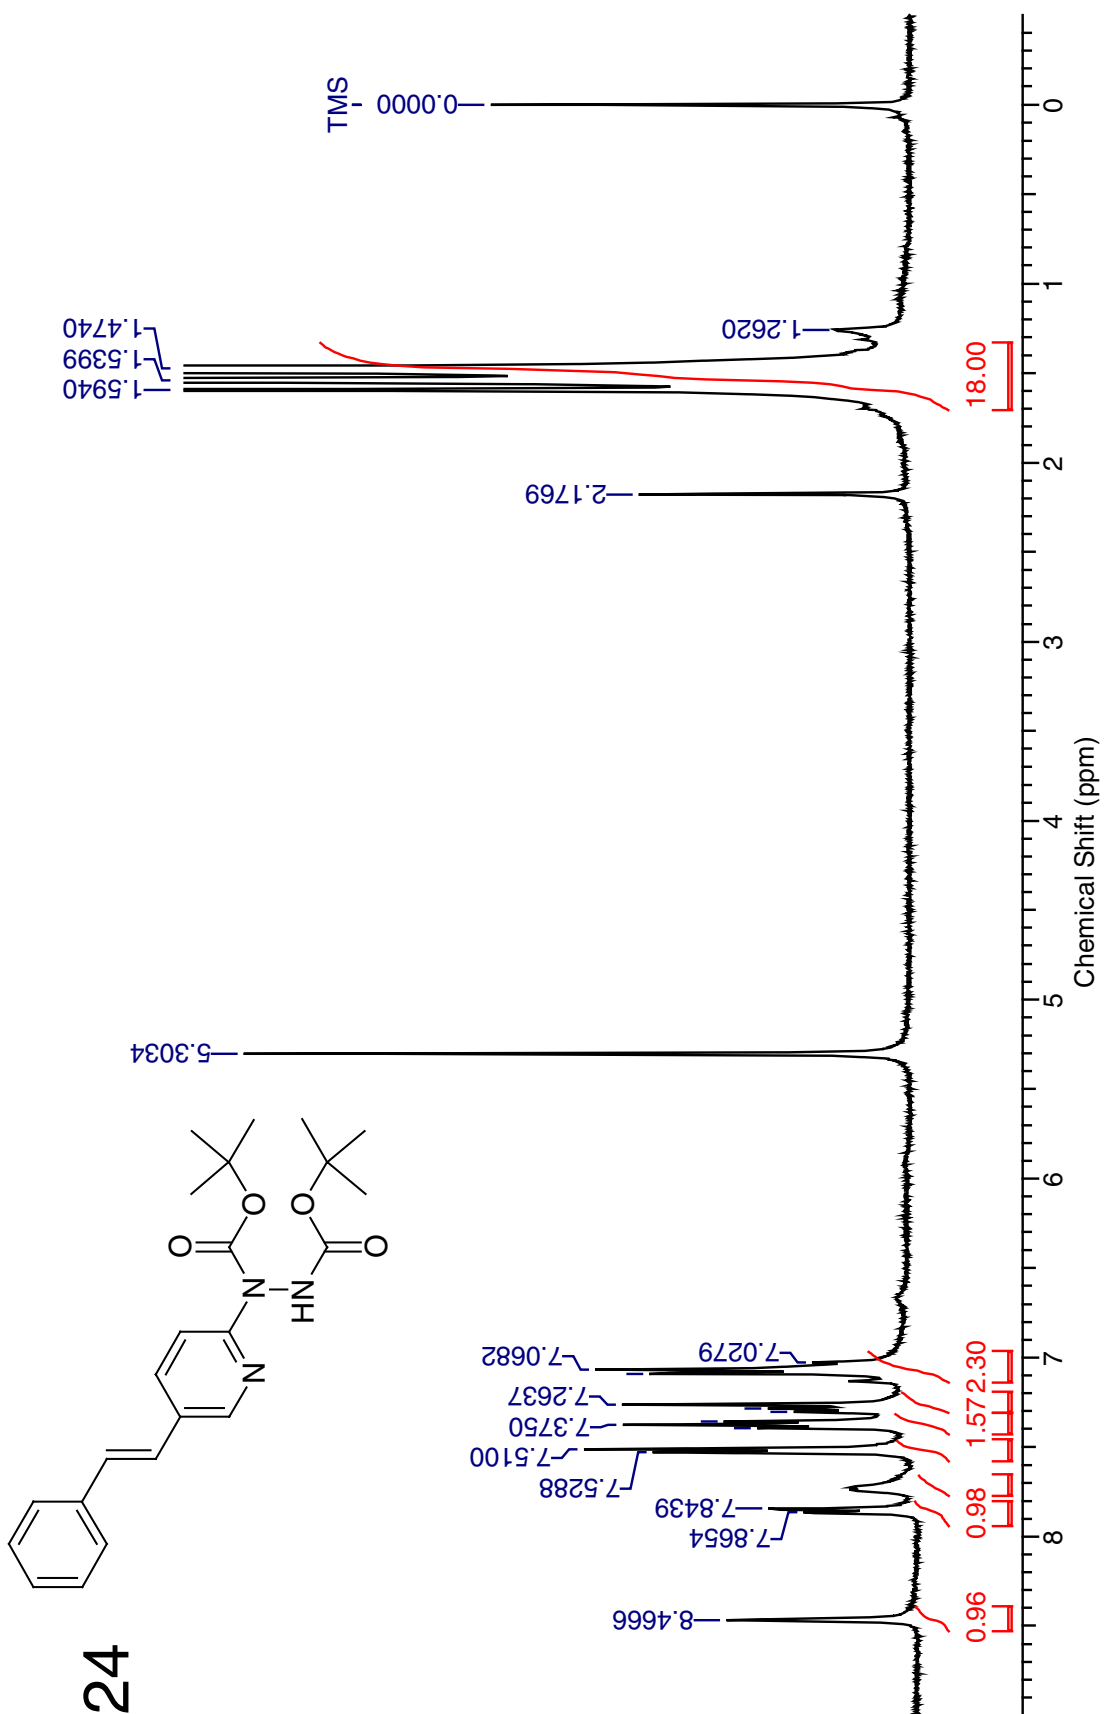

24

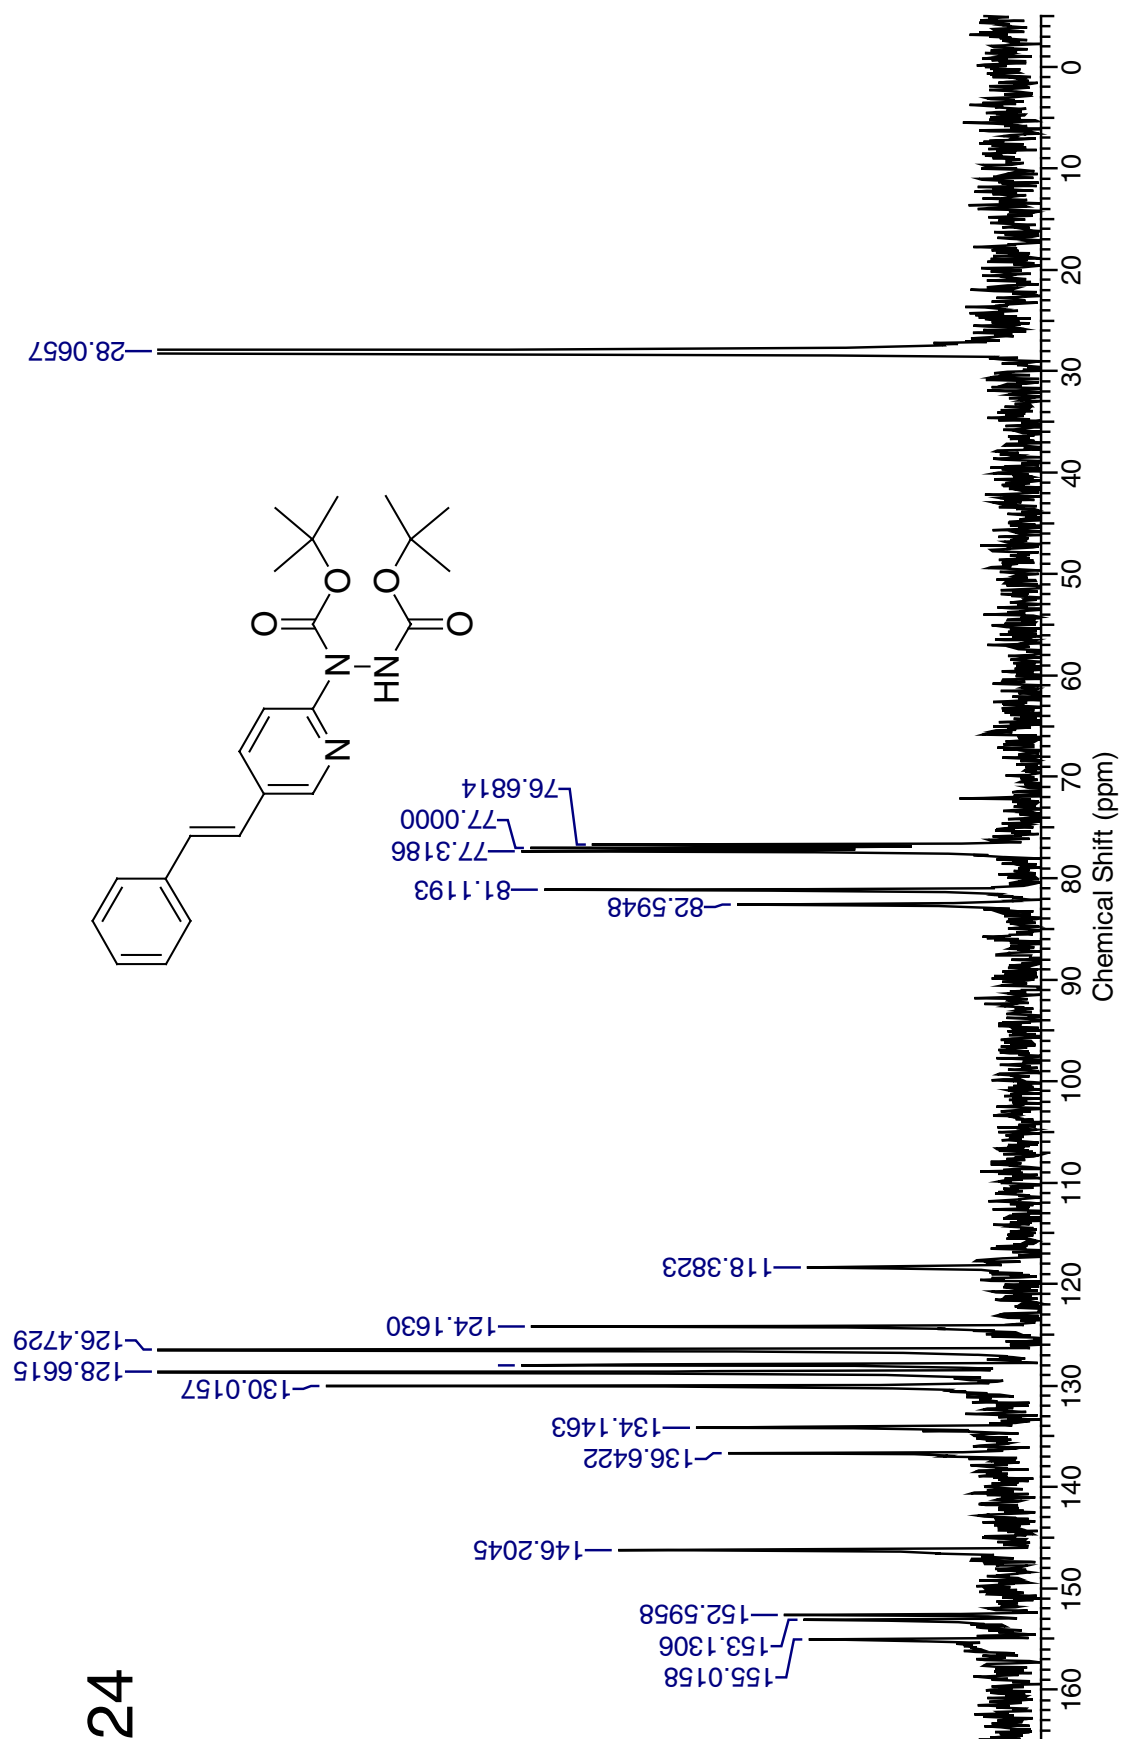



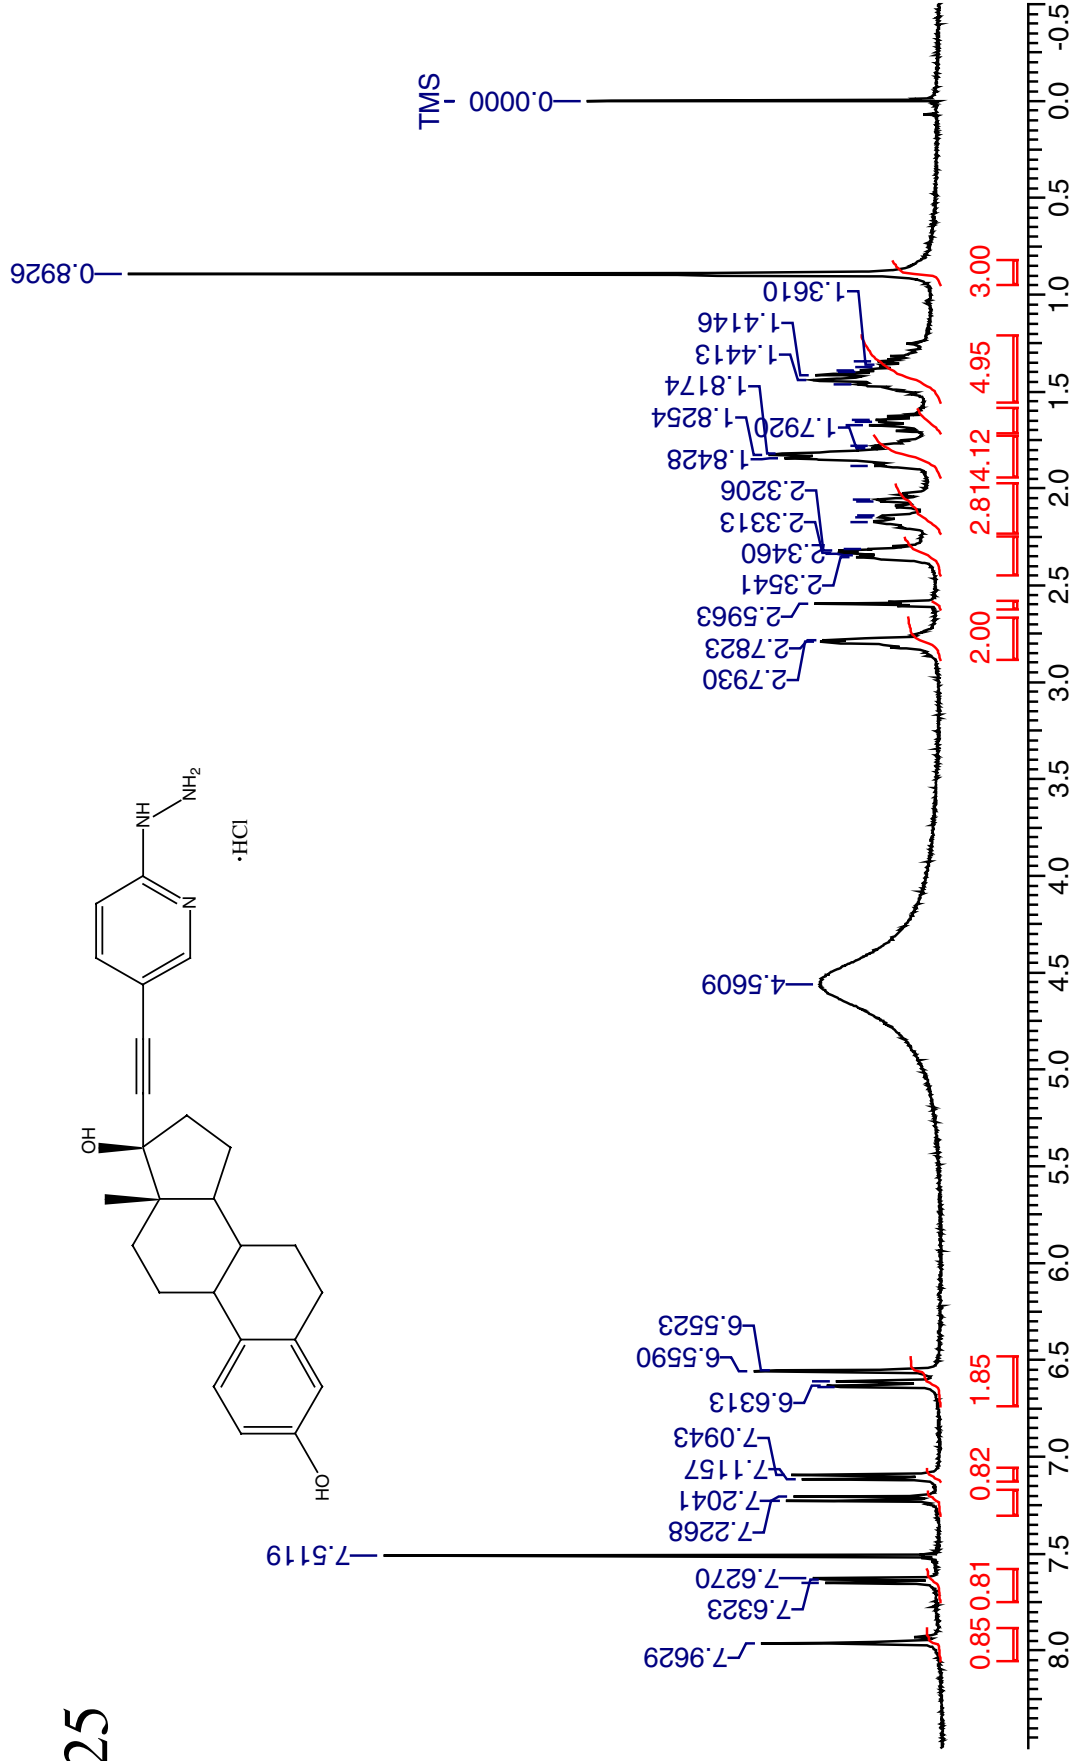

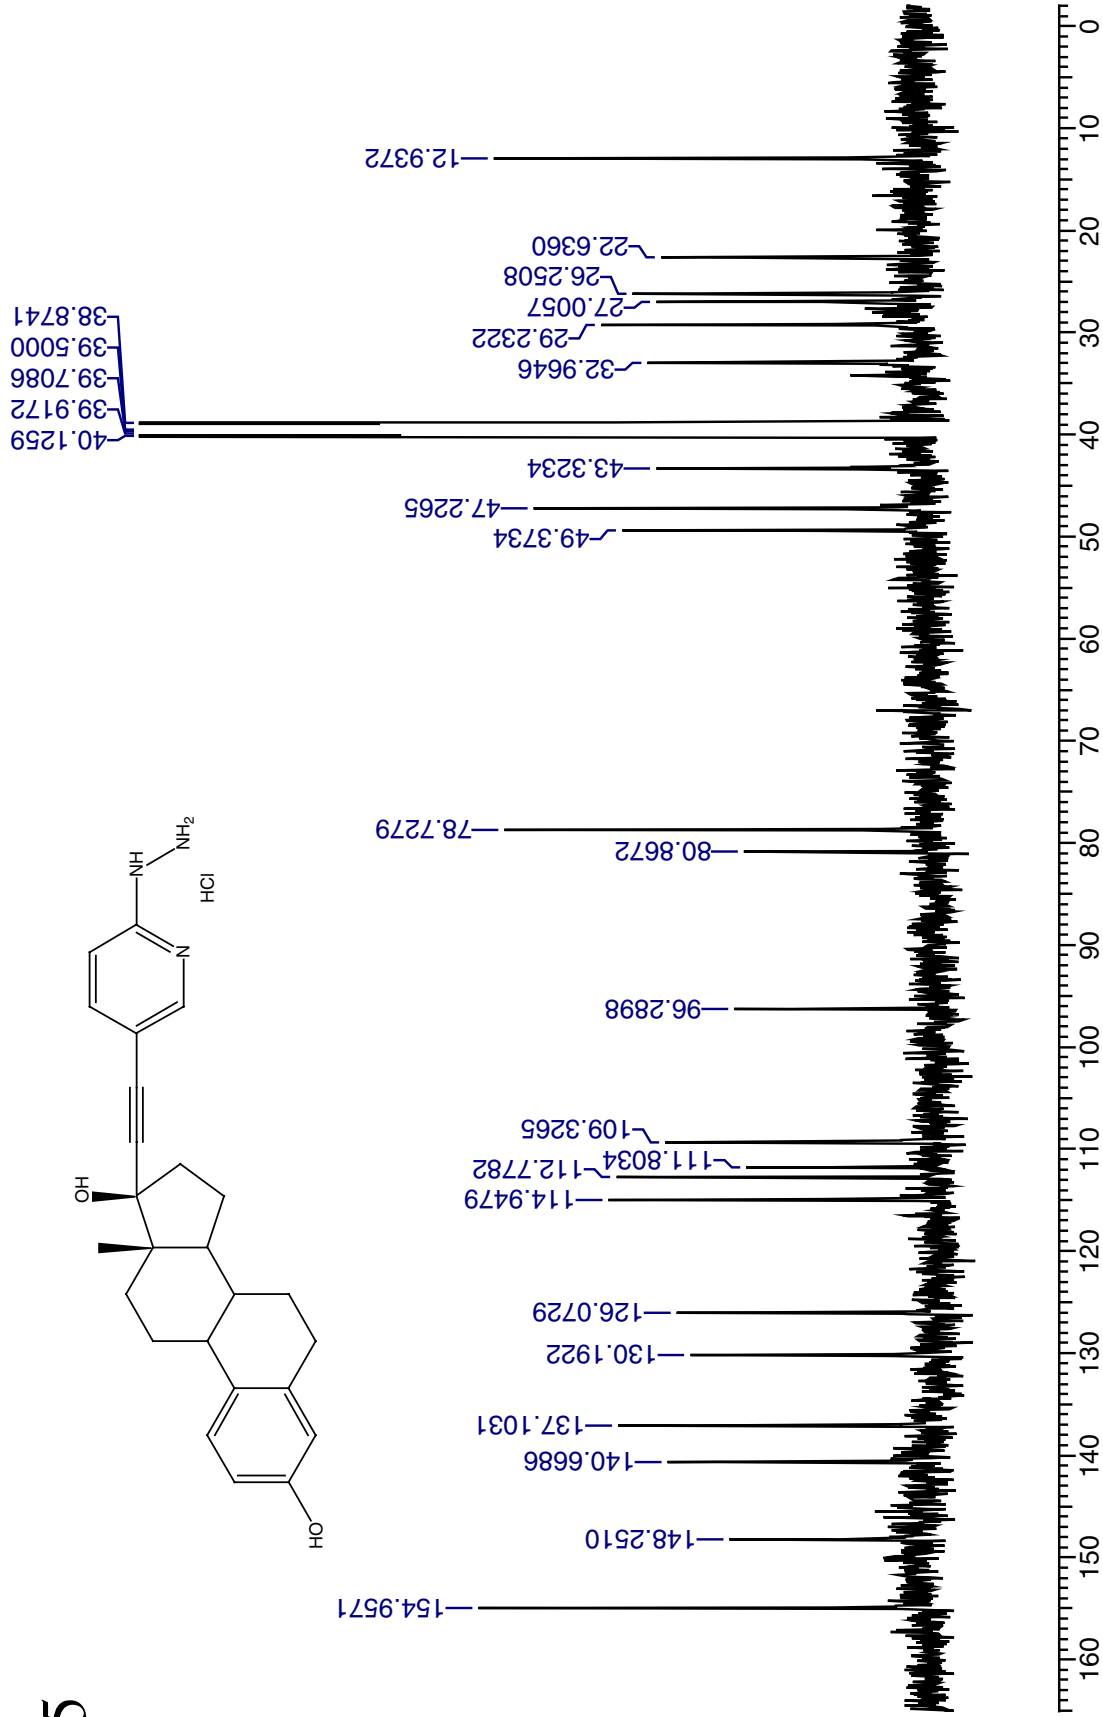

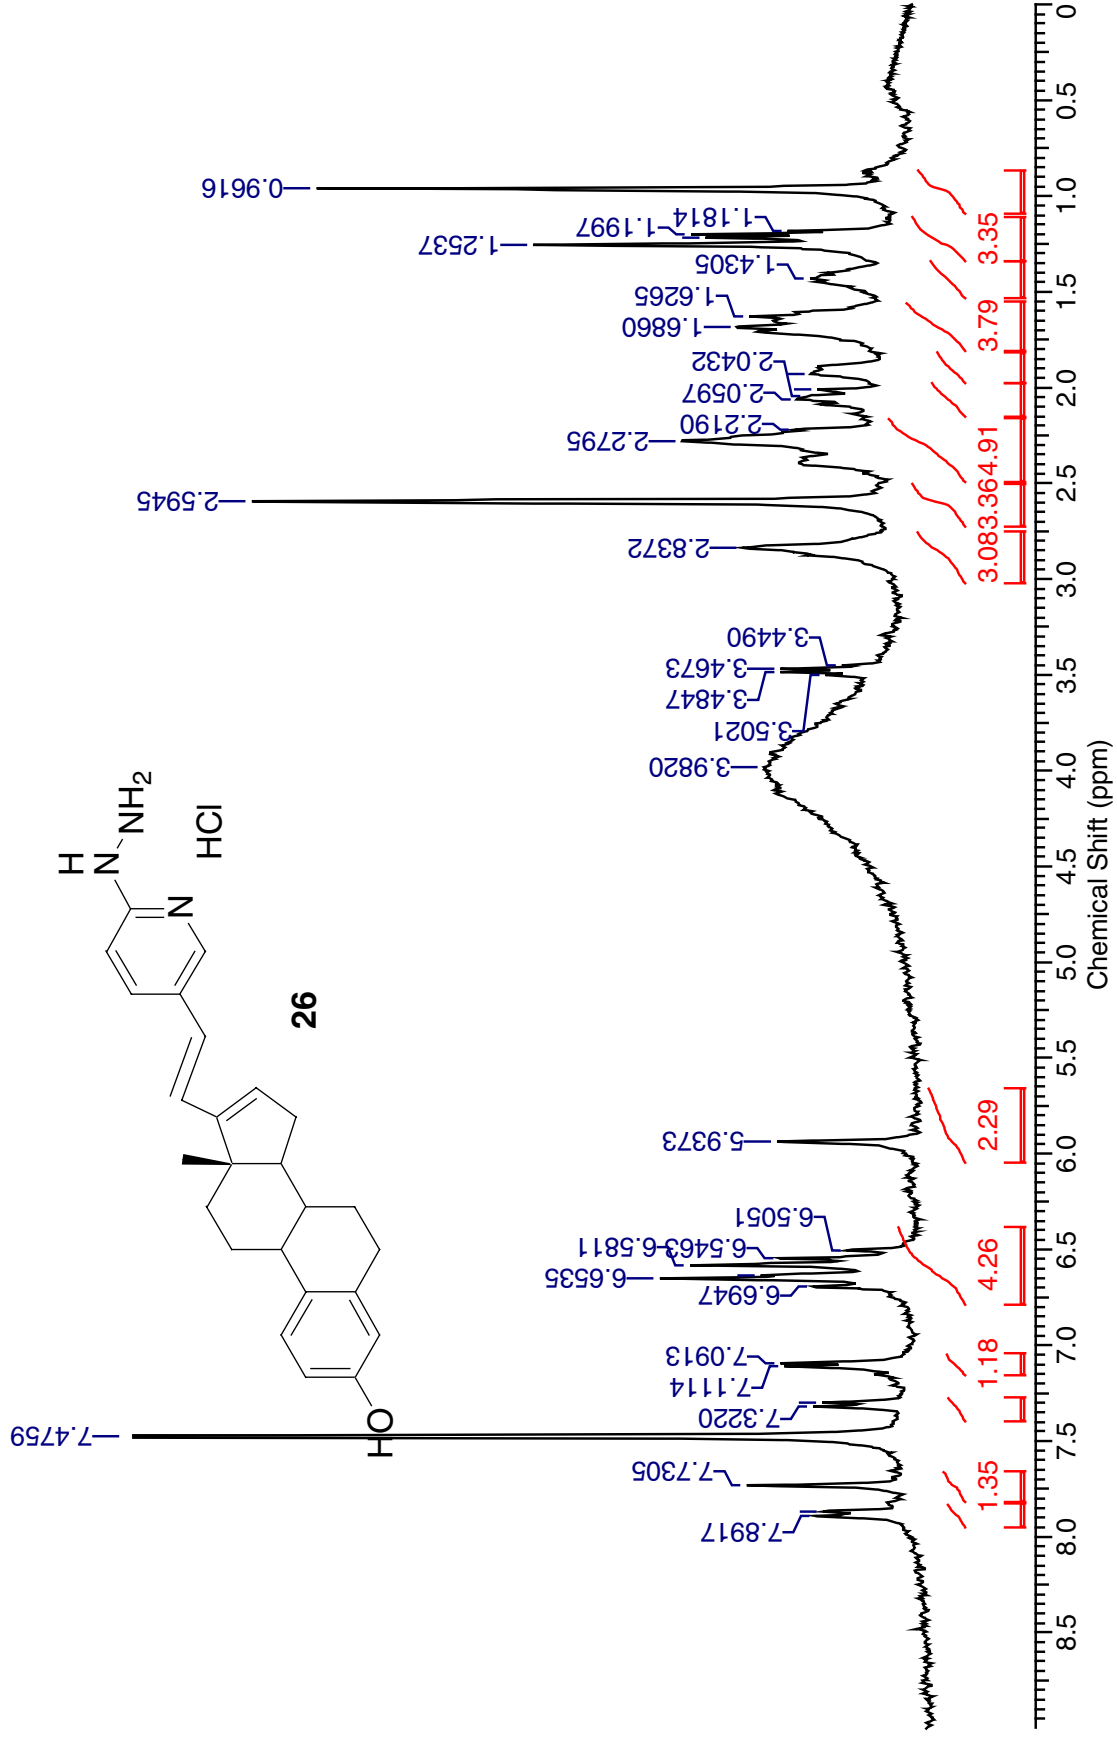

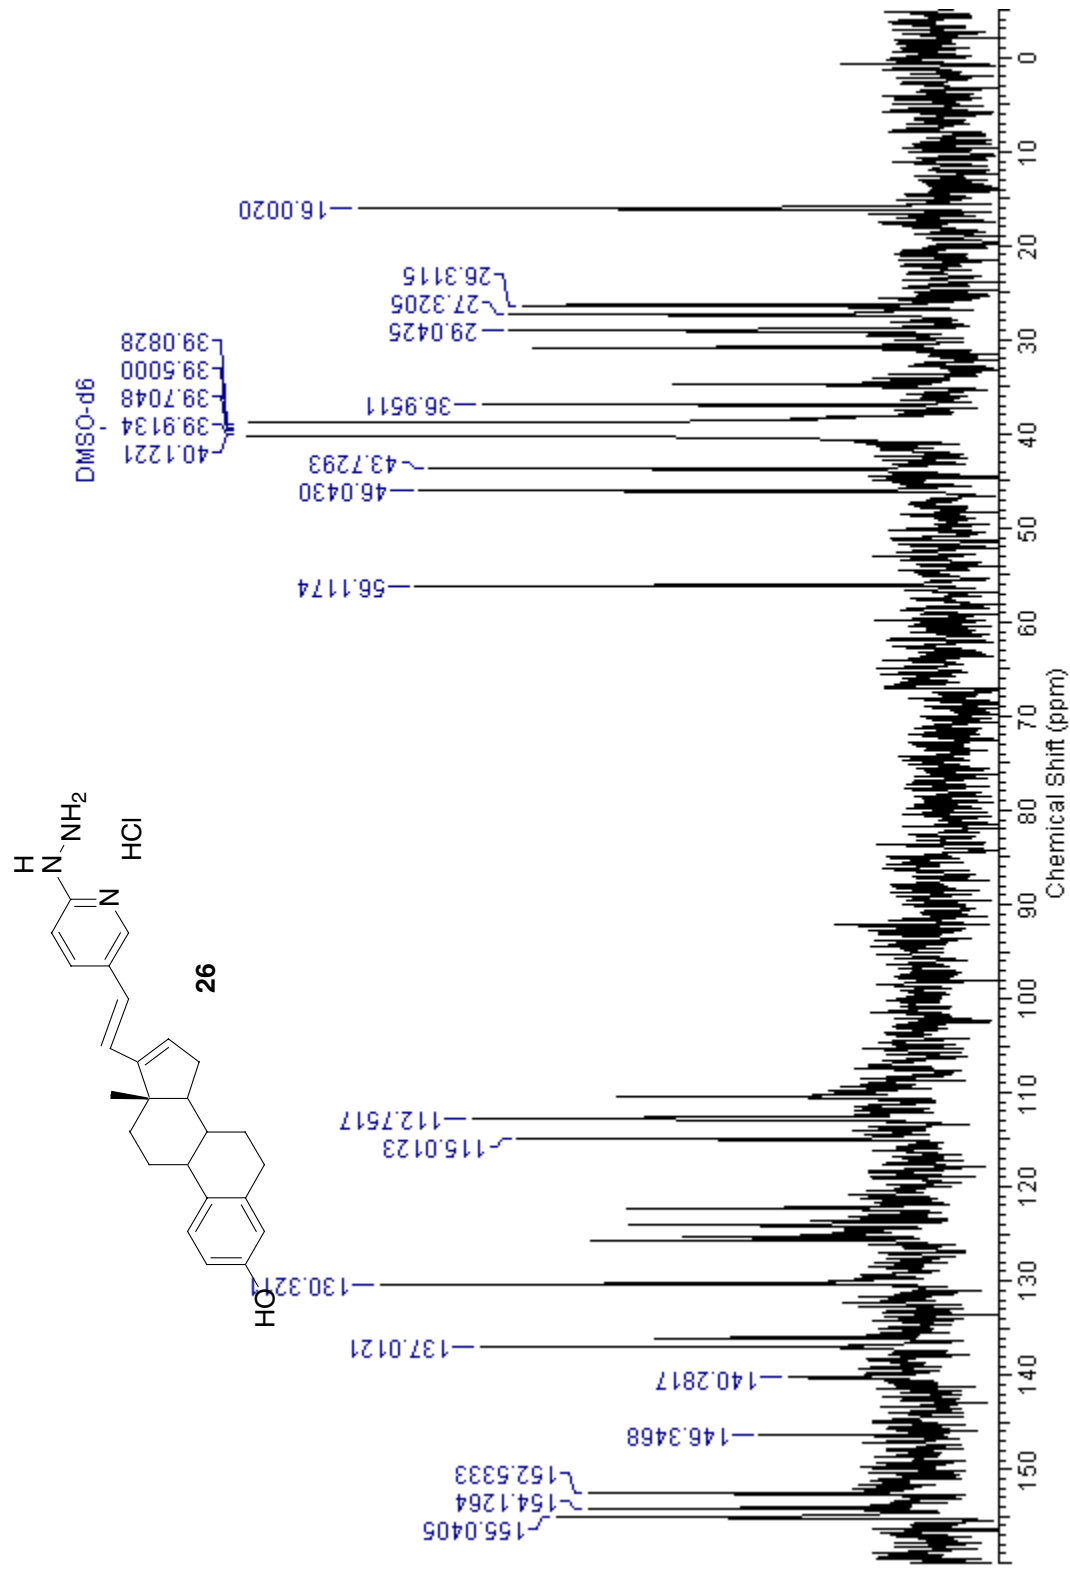

Supplement: Supplementary file 1 [file 5790654]
